# Supplementary material for: Multiphoton tandem photoredox catalysis of [Ir(dFCF3ppy)2(dtbbpy)]+ facilitating radical acylation reactions
Source: Royal Society of Chemistry journal article supplement (doi:10.1039/d4sc03183k), 2024-01-01
Supplement: d4sc03183k1.pdf [file d4sc03183k1.pdf]

## Supporting Information

### **Multiphoton tandem photoredox catalysis of $[\text{Ir}(\text{dFCF}_3\text{ppy})_2(\text{dtbbpy})]^+$ facilitating radical acylation reactions**

Zhicong Lin,<sup>#</sup> Qian Zhou,<sup>#</sup> Yan Liu, Chenli Chen, Jialong Jie,<sup>\*</sup> and Hongmei Su

College of Chemistry, Beijing Normal University, Beijing 100875, China;

<sup>#</sup> Z. L. and Q. Z. contributed equally to this work.

<sup>\*</sup> Corresponding Author: [jialong@bnu.edu.cn](mailto:jialong@bnu.edu.cn)

## 1. Materials and Methods

**Materials.** [Ir(dF(CF<sub>3</sub>)ppy)<sub>2</sub>(dtbbpy)]PF<sub>6</sub> (Macklin), [Ir(dF(CF<sub>3</sub>)ppy)<sub>2</sub>(dtbbpy)]PF<sub>6</sub> (Macklin), 4-iodotoluene (Aladdin), 4-iodobenzoylformic acid (Chemzju), (E)-3-(2-isocyanophenyl)acrylonitrile (Chemzju), 3-pentyl-2-ketone (Adamas), 4-Chlorobenzoylformic acid (APINNO), β-(Naphthalen-1-yl)-2-oxoacetic acid (Bidepharm), Phenylglyoxylic acid (Innochem), triethylamine (TEA, Innochem), Pd(Nixantphos)Cl<sub>2</sub> (Chemzju), Acetonitrile (CH<sub>3</sub>CN, Macklin), *N,N*-Dimethylformamide (DMF, Innochem), Disodium Hydrogen Phosphate (Na<sub>2</sub>HPO<sub>4</sub>, Innochem), Monosodium phosphate (NaH<sub>2</sub>PO<sub>4</sub>, Innochem) were used as received. Ultrapure water was obtained by Millipore filtration.

**Laser flash photolysis.** Nanosecond time-resolved transient absorption spectra were measured using a flash photolysis setup Edinburgh LP980 spectrometer (Edinburgh Instruments Ltd.). A Surelite II-10 Q-Switched Nd:YAG laser (Continuum) provides third harmonic laser pulses at 355 nm with a repetition rate of 10 Hz and maximum output of 1.5 W. The laser output was directed to a Horizon I Mid-band Optical Parametric Oscillator (OPO) (Continuum) to produce tunable pump pulses from 192 nm to 2750 nm spectral region. In this work, the sample was excited by a 430 nm laser pulse (1 Hz, 20 mJ/pulse/cm<sup>2</sup>, fwhm ≈ 7 ns). Each measurement was performed in a quartz cuvette with 1 cm path length at room temperature. The analyzing light was from a 150 W pulsed xenon lamp. A monochromator equipped with a photomultiplier for collecting the spectral range from 300 to 700 nm was used to analyze transient absorption spectra. The signals from the photomultiplier were displayed and recorded as a function of time on a 100 MHz (1.25 Gs/s sampling rate) oscilloscope (Tektronix, TDS 3012C), and the data were transferred to a personal computer. Data were analyzed by the online software of the LP980 spectrophotometer. The fitting quality was judged by weighted residuals and reduced  $\chi^2$  value.

**Steady-state Spectral Measurement.** The UV-vis absorption spectra were measured using a UV-vis spectrometer (U-3010, Hitachi). Each measurement was collected from 300 to 700 at a scan speed of 600 nm/min. The spectrum of a blank sample containing the pure solvent was used as the background, which was subtracted from the averaged spectra. Emission spectra were measured on a fluorescence spectrometer (F4600, Hitachi). Quartz cuvettes of 1 × 1 cm were used for all absorption and emission spectral measurements. Fourier transform infrared (FTIR) spectra were recorded using a Bruker Vertex 80 V, with a spectral resolution of 4 cm<sup>-1</sup>. The 2 mm-thick CaF<sub>2</sub> windows (100 μm optical path length) was used for the measurements.

**Computational Methods.** The geometries were fully optimized at the B3LYP/LANL2DZ: 6-31G\*\* level of theory and at the B3LYP/6-31G\*\* level of theory, for Ir species and substrate species, respectively. The harmonic vibrational frequencies analysis was performed to identify the geometry as local minima and to extract zero-point vibrational energy corrections. Bulk solvation effects were simulated by using the polarizable continuum model (PCM). The vertical electronic excitations were calculated using time-dependent (TD)-B3LYP method based on the ground-state geometry optimized at the same level. All the calculations were carried out using the Gaussian 09 program package. GaussView molecular modeling software was used to plot the molecular orbitals and draw the molecular structure.

## 2. Additional experimental and calculational results.

**Fig. S1** (a) Steady-state UV-vis absorption spectra for 150  $\mu\text{M}$  IrIII (black), 10 mM PhCOCOOH (red) and 150  $\mu\text{M}$  IrIII + 10 mM PhCOCOOH (blue) in ACN/phosphate buffer (pH 7, v/v = 1:1); (b) Steady-state emission spectra of IrIII (150  $\mu\text{M}$ ) at different concentrations of PhCOCOOH under deoxygenated conditions in ACN-phosphate buffer (pH 7, v/v = 1:1) following 430 nm excitation; (c) Transient emission kinetics of  $^3\text{IrIII}^*$  at 470 nm at different concentrations of PhCOCOOH; (d) Stern-Volmer plot obtained from the decay lifetime of  $^3\text{IrIII}^*$  with different concentrations of PhCOCOOH.

**Fig. S2** (a) Steady-state UV-vis absorption spectra for 150  $\mu\text{M}$  IrIII (black), 10 mM Cl-PhCOCOOH (red) and 150  $\mu\text{M}$  IrIII with 10 mM Cl-PhCOCOOH (blue) in ACN-phosphate buffer (pH 7, v/v = 1:1); (b) Steady-state emission spectra of IrIII (150  $\mu\text{M}$ ) at different concentrations of Cl-PhCOCOOH under deoxygenated conditions in ACN-phosphate buffer (pH 7, v/v = 1:1) following 430 nm excitation; (c) Transient emission kinetics of  $^3\text{IrIII}^*$  at 470 nm at different concentrations of Cl-PhCOCOOH; (d) Stern-Volmer plot obtained from the decay lifetime of  $^3\text{IrIII}^*$  with different concentrations of Cl-PhCOCOOH.

**Fig. S3** (a) Steady-state UV-vis absorption spectra for 150  $\mu\text{M}$  IrIII (black), 10 mM I-PhCOCOOH (red) and 150  $\mu\text{M}$  IrIII with 10 mM I-PhCOCOOH (blue) in ACN/phosphate buffer (pH 7, v/v = 1:1); (b) Steady-state emission spectra of IrIII (150  $\mu\text{M}$ ) at different concentrations of I-PhCOCOOH under deoxygenated conditions in ACN-phosphate buffer (pH 7, v/v = 1:1) following 430 nm excitation; (c) Transient emission kinetics of  $^3\text{IrIII}^*$  at 470 nm at different concentrations of I-PhCOCOOH; (d) Stern-Volmer plot obtained from the decay lifetime of  $^3\text{IrIII}^*$  with different concentrations of I-PhCOCOOH.

**Fig. S4** Cyclic voltammogram of NaphCOCOOH (a), PhCOCOOH (b), Cl-PhCOCOOH (c), I-PhCOCOOH (d) in DMSO. The anodic peak potentials, vs saturated calomel electrode (SCE), are 0.88 V for NaphCOCOOH, 0.96 V for PhCOCOOH, 1.03 V for Cl-PhCOCOOH and 0.51 V for I-PhCOCOOH, respectively.

**Fig. S5** (a) Steady-state UV-vis absorption spectra for 150  $\mu\text{M}$  IrIII (black), 10 mM 3-pentyl-2-ketone (red) and 150  $\mu\text{M}$  IrIII + 10 mM 3-pentyl-2-ketone (blue) in ACN/phosphate buffer (pH 7, v/v = 1:1); (b) Transient emission kinetics at 470 nm of  $^3\text{IrIII}^*$  with different concentrations of 3-pentyl-2-ketone under deoxygenated conditions in ACN/phosphate buffer (pH 7, v/v = 1:1); (c) Stern-Volmer plot obtained from the decay lifetime of  $^3\text{IrIII}^*$  with different concentrations of 3-pentyl-2-ketone.

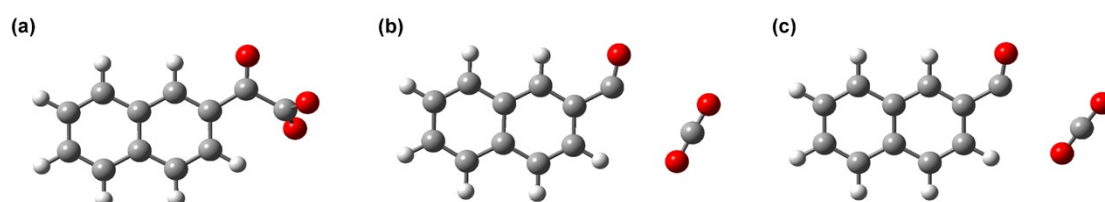

**Fig. S6** (a) The input structure of NaphCOCOO $^{\bullet}$  radical; The optimized structures of NaphCOCOO $^{\bullet}$  radical obtained at the level of B3LYP/6-31G $^{**}$ /PCM/water (b) and B3LYP/6-31G $^{**}$ /PCM/acetonitrile (c).

In comparison with the input structure of NaphCOCOO $^{\bullet}$  radical, the optimized structures reveal that CO $_2$  has been already detached, suggesting the expulsion of CO $_2$  from the NaphCOCOO $^{\bullet}$  radical to yield the acyl radical is a barrier-free process. Consequently, once this open-shell dicarbonyl radical is formed, a rapid detachment of CO $_2$  can be anticipated.

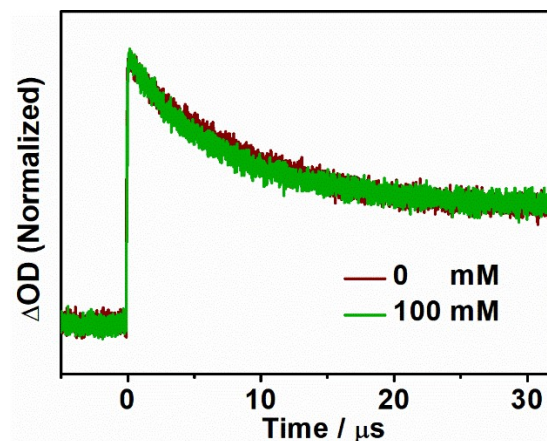

**Fig. S7** Representative decay-traces at 525 nm for IrIII (150  $\mu$ M) + NaphCOCOOH (10 mM) (red) and IrIII (150  $\mu$ M) + NaphCOCOOH (10 mM) + 3-pentyl-2-ketone (100 mM) (green).

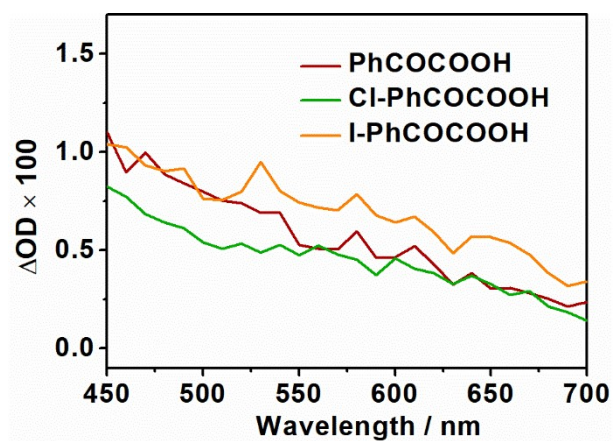

**Fig. S8** Transient absorption spectra of IrIII (150  $\mu$ M) +  $\alpha$ -keto acids (10 mM, red: PhCOCOOH; green: Cl-PhCOCOOH; orange: I-PhCOCOOH) at 20  $\mu$ s.



**Fig. S9** Normalized kinetics curves for transient absorptions at (a) 450 nm, (b) 525 nm and (c) 650 nm of **IrIII** (150  $\mu\text{M}$ ) + NaphCOCOOH (10 mM) (red) and **IrIII** (150  $\mu\text{M}$ ) + NaphCOCOOH (10 mM) + 3-penten-2-one (100 mM) (green) under deoxygenated conditions in ACN/phosphate buffer (pH 7, v/v =1:1) at a longer time scale.

**Fig. S10** Steady-state emission spectra of **IrIII** (150  $\mu$ M) +  $\alpha$ -keto acids (10 mM, a: PhCOCOOH; d: Cl-PhCOCOOH; g:I-PhCOCOOH) + 3-pentyl-2-ketone (100 mM) under deoxygenated conditions in ACN/phosphate buffer (pH 7, v/v = 1:1) under continuous illumination by 430 nm laser (20 mJ); Species analysis of **IrIII** +  $\alpha$ -keto acids (b: PhCOCOOH; e: Cl-PhCOCOOH; h: I-PhCOCOOH) + 3-pentyl-2-ketone; Steady-state emission spectra of **IrIII** +  $\alpha$ -keto acids (c: PhCOCOOH; f: Cl-PhCOCOOH; i: I-PhCOCOOH) + 3-pentyl-2-ketone before (black) and after (red) continuous illumination by 430 nm laser (20 mJ).

**Fig. S11** Steady-state emission spectra of S1 (a) and S2 (d) under deoxygenated conditions in DMA following 430 nm excitation; (S1: IrIII (150  $\mu$ M) + PhCOCOOH (40 mM) + 4-Iodotoluene (20 mM) + Ni (2 mM) with 40 mM Li<sub>2</sub>CO<sub>3</sub>, S2: IrIII (150  $\mu$ M) + PhCOCOOH (200 mM) + 2-alkenylarylisocyanides (100 mM) with 160 mM Na<sub>2</sub>HPO<sub>4</sub>); Species analysis of S1 (b) and S2 (e); Steady-state emission spectra of S1 (c) and S2 (f) before (black) and after (red) continuous illumination by 430 nm laser (20 mJ).

**Fig. S12** (a) Decay-traces at 525 nm for **IrIII** (150  $\mu$ M) + NaphCOCOOH (10 mM) + 3-pentyl-2-ketone (100 mM) under deoxygenated conditions in ACN/phosphate buffer (v/v = 1:1) at different pH following 430 nm excitation; (b) Normalized kinetics curves for transient absorptions at 525 nm for **IrIII** (150  $\mu$ M) at different concentrations of NaphCOCOOH under deoxygenated conditions in ACN/phosphate buffer (pH 7, v/v = 1:1) following 430 nm excitation.

As depicted in Fig. S12a, as the pH value increases, the decay kinetics at 530 nm gradually slows down, accompanied by an increase in absorption intensity after the decay. Such a tendency is consistent with the expectation that at a higher pH, the protonation of **IrII** into **IrH<sup>+</sup>** would be prohibited, leading to a higher proportion of **IrII** exhibiting stronger absorption at 530 nm in the equilibrium between **IrII** and **IrH<sup>+</sup>**. These findings demonstrate the observed decay of **IrII** corresponds to its protonation, thereby reinforcing the proposed identification of this new Ir species as **IrH<sup>+</sup>**.

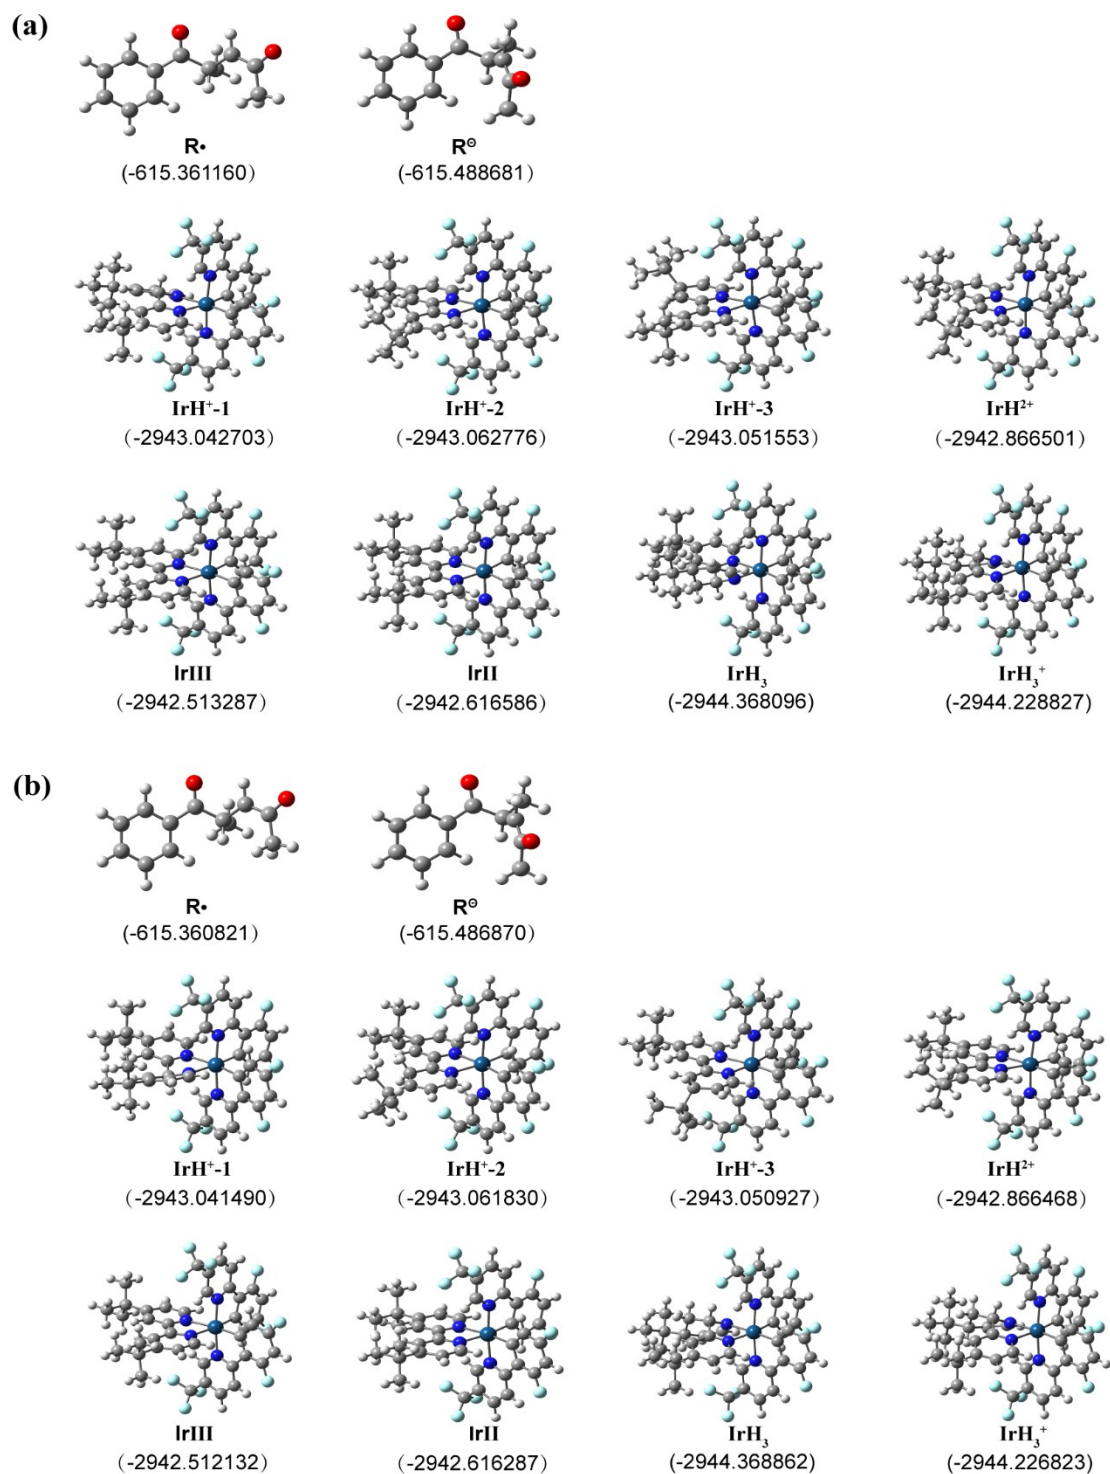

**Fig. S13** The structures of reactant and related intermediates of IrIII photocatalytic radical acylation reactions optimized at the level of B3LYP/6-31G\*\*/PCM/water (a) and B3LYP/6-31G\*\*/PCM/acetonitrile (b). The parentheses indicate Gibbs Free Energy (G) (in Hartree) calculated with Zero-Point Energy (ZPE) correction. Note that among the three possible structures of IrH<sup>+</sup> (IrH<sup>+</sup>-1, IrH<sup>+</sup>-2, and IrH<sup>+</sup>-3), IrH<sup>+</sup>-2 is shown to be the most stable. Therefore, the Gibbs Free Energy (G) for IrH<sup>+</sup> used in this work is based on the structure of IrH<sup>+</sup>-2.

**Table S1.** Oxidation potential of  $\alpha$ -keto acids and the calculated  $\Delta G_0$ .

| Donor ( $\alpha$ -keto acids)<br>$E(D^{*+}/D)$ vs SCE / V |      | Acceptor (IrIII)<br>$E(A^{*+}/A)$ vs SCE / V | $\Delta G_0$<br>[ $E(D^{*+}/D) - E(A^{*+}/A)$ ] |
|-----------------------------------------------------------|------|----------------------------------------------|-------------------------------------------------|
| NaphCOCOOH                                                | 0.88 | 1.21                                         | -0.33                                           |
| PhCOCOOH                                                  | 0.96 |                                              | -0.25                                           |
| Cl-PhCOCOOH                                               | 1.03 |                                              | -0.18                                           |
| I-PhCOCOOH                                                | 0.51 |                                              | -0.70                                           |

**Table S2.** B3LYP/6-31G\*\* calculated IR frequencies and IR intensities for relevant species in  $D_2O$  with the solvent effect simulated by PCM model, as well as the observed IR frequencies for these species. Note:  $C=O^a$  indicates the carbonyl group of NaphCOCOOH;  $C=O^b$  belongs to 3-Penten-2-keone; The values in parentheses are scaled by a factor of 0.96, which is usually adopted for B3LYP method.

| Species                                                                             | $\nu_{\text{calc}}/\text{cm}^{-1}$<br>(PCM = $D_2O$ ) | Intensity/<br>$\text{km mol}^{-1}$ | $\nu_{\text{exp}}/\text{cm}^{-1}$ |
|-------------------------------------------------------------------------------------|-------------------------------------------------------|------------------------------------|-----------------------------------|
| <b>Final 1,4-addition product</b>                                                   |                                                       |                                    |                                   |
| 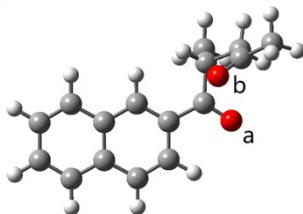 | $C=O^b$ 1774 (1703)                                   | 226                                | 1672                              |
|                                                                                     | $C=O^a$ 1729 (1660)                                   | 451                                | 1643                              |

**Table S3.** B3LYP/6-31G\*\* calculated Gibbs Free Energy difference [ $\Delta G = \sum G(\text{product}) - \sum G(\text{reactant})$ ] in H<sub>2</sub>O and in ACN, respectively.

| Reactions                                                                                                                                                                                                                                                                                                                         | $\Delta G$ (kJ/mol) |         |
|-----------------------------------------------------------------------------------------------------------------------------------------------------------------------------------------------------------------------------------------------------------------------------------------------------------------------------------|---------------------|---------|
|                                                                                                                                                                                                                                                                                                                                   | H <sub>2</sub> O    | ACN     |
| $\text{IrII} + \text{R} \begin{array}{c} \text{O} \\ \parallel \\ \text{C} \\   \\ \text{C} \cdot \\   \\ \text{C} \\ \parallel \\ \text{O} \end{array} \longrightarrow \text{IrIII} + \text{R} \begin{array}{c} \text{O} \\ \parallel \\ \text{C} \\   \\ \text{C}^- \\   \\ \text{C} \\ \parallel \\ \text{O} \end{array}$      | -63.59              | -57.51  |
| $\text{IrH}_3^+ + \text{IrII} \longrightarrow \text{IrH}_3 + \text{IrIII}$                                                                                                                                                                                                                                                        | -99.46              | -99.46  |
| $\text{IrH}_3^* + \text{R} \begin{array}{c} \text{O} \\ \parallel \\ \text{C} \\   \\ \text{C} \cdot \\   \\ \text{C} \\ \parallel \\ \text{O} \end{array} \longrightarrow \text{IrH}_3^+ + \text{R} \begin{array}{c} \text{O} \\ \parallel \\ \text{C} \\   \\ \text{C}^- \\   \\ \text{C} \\ \parallel \\ \text{O} \end{array}$ | -186.19             | -175.08 |
| $\text{IrH}_3 + \text{R} \begin{array}{c} \text{O} \\ \parallel \\ \text{C} \\   \\ \text{C} \cdot \\   \\ \text{C} \\ \parallel \\ \text{O} \end{array} \longrightarrow \text{IrH}_3^+ + \text{R} \begin{array}{c} \text{O} \\ \parallel \\ \text{C} \\   \\ \text{C}^- \\   \\ \text{C} \\ \parallel \\ \text{O} \end{array}$   | 41.96               | 308.42  |
| $\text{IrH}^+ + \text{R} \begin{array}{c} \text{O} \\ \parallel \\ \text{C} \\   \\ \text{C} \cdot \\   \\ \text{C} \\ \parallel \\ \text{O} \end{array} \longrightarrow \text{IrH}^{2+} + \text{R} \begin{array}{c} \text{O} \\ \parallel \\ \text{C} \\   \\ \text{C}^- \\   \\ \text{C} \\ \parallel \\ \text{O} \end{array}$  | 128.55              | 180.51  |

#### 4. Optimized Cartesian Coordinates

##### 1,4-addition product (in D<sub>2</sub>O)

|   |             |             |             |
|---|-------------|-------------|-------------|
| C | 2.10784600  | -0.63364000 | 0.89010300  |
| H | 1.64702600  | -1.43858500 | 0.31250900  |
| C | 3.70207200  | -0.31324000 | -1.07555200 |
| C | 5.11026100  | -0.30813100 | -1.62989600 |
| H | 5.57602500  | -1.28714300 | -1.46881400 |
| H | 5.09407300  | -0.08532200 | -2.69759800 |
| H | 5.72811800  | 0.42770000  | -1.10438700 |
| C | 2.03351300  | -0.99049300 | 2.39046600  |
| H | 2.56388100  | -1.92746600 | 2.58418900  |
| H | 2.49383800  | -0.20426200 | 2.99730400  |
| H | 0.99820400  | -1.11272300 | 2.72151900  |
| O | 2.72547700  | -0.18602800 | -1.79996500 |
| C | -0.80285200 | 1.88244600  | 0.19890200  |
| C | -2.14820700 | 1.93164900  | -0.06259300 |
| C | -2.91607100 | 0.73761300  | -0.17374600 |
| C | -2.25390300 | -0.52250200 | -0.00736200 |
| C | -0.85979400 | -0.53974500 | 0.25871800  |
| H | -4.81106800 | 1.70587300  | -0.56879900 |
| H | -0.21651500 | 2.78989500  | 0.28688400  |
| H | -2.64828100 | 2.88819800  | -0.18803800 |
| C | -4.30996300 | 0.75020300  | -0.44211700 |
| C | -3.01185500 | -1.72094300 | -0.11544500 |
| H | -0.38280600 | -1.50632700 | 0.38121700  |
| C | -4.36332900 | -1.67533300 | -0.37596000 |
| C | -5.01707300 | -0.42885600 | -0.54069100 |
| H | -2.50587900 | -2.67415400 | 0.01112900  |
| H | -4.93413200 | -2.59522700 | -0.45684400 |
| H | -6.08302000 | -0.40687300 | -0.74631700 |
| C | -0.13214200 | 0.63430400  | 0.36298500  |
| C | 1.33574700  | 0.66811500  | 0.65415500  |
| O | 1.91224500  | 1.74674100  | 0.76658900  |
| C | 3.55972100  | -0.48633500 | 0.42751300  |
| H | 4.15309500  | -1.35508800 | 0.73839200  |
| H | 4.02184100  | 0.38514300  | 0.90777500  |

##### R\* (in H<sub>2</sub>O)

|   |             |             |             |
|---|-------------|-------------|-------------|
| C | 2.29215900  | -0.57980100 | -0.02307600 |
| C | 1.02750200  | -0.00785300 | 0.52471900  |
| C | -3.05310700 | 1.63329000  | -0.02917400 |
| C | -1.76884300 | 1.11672100  | 0.14215800  |
| C | -1.52661500 | -0.25618500 | -0.03303000 |



|   |             |             |             |
|---|-------------|-------------|-------------|
| C | -2.59839200 | -1.09714900 | -0.38338800 |
| C | -3.87712100 | -0.57983700 | -0.55919600 |
| C | -4.10727900 | 0.78857800  | -0.38155600 |
| H | -3.22884700 | 2.69506200  | 0.11136800  |
| H | -0.96742900 | 1.79279400  | 0.41712000  |
| H | -2.40273300 | -2.15558700 | -0.51421800 |
| H | -4.69551800 | -1.23836900 | -0.83323900 |
| H | -5.10533900 | 1.19400600  | -0.51743900 |
| C | -0.18004400 | -0.88475500 | 0.13990900  |
| O | -0.03627600 | -2.09575100 | 0.02135800  |
| C | 3.42278600  | 0.16843500  | -0.50794600 |
| O | 4.43543400  | -0.44368000 | -0.90000400 |
| C | 3.37556700  | 1.68588900  | -0.54835100 |
| H | 4.34024000  | 2.06335000  | -0.88991900 |
| H | 3.15308500  | 2.10724000  | 0.43759500  |
| H | 2.59491700  | 2.03459000  | -1.23380300 |
| H | 2.39027900  | -1.66115700 | -0.03809800 |
| H | 0.88747400  | 1.00856400  | 0.15108000  |
| C | 1.08407400  | 0.05594000  | 2.08385500  |
| H | 1.22488200  | -0.94574200 | 2.49806700  |
| H | 0.15626700  | 0.47324700  | 2.48527800  |
| H | 1.91533800  | 0.68780700  | 2.40583000  |

R<sup>⊖</sup> (in H<sub>2</sub>O)

|   |             |             |             |
|---|-------------|-------------|-------------|
| C | 1.96018400  | 0.10704300  | 0.51501600  |
| C | 1.38326500  | 0.94593200  | -0.60513500 |
| C | -2.44173700 | -1.36509100 | -0.95359400 |
| C | -1.26955600 | -0.60927900 | -0.92185700 |
| C | -1.14231300 | 0.48152400  | -0.04494500 |
| C | -2.23080100 | 0.79675200  | 0.78686300  |
| C | -3.39853600 | 0.03768700  | 0.76331200  |
| C | -3.50910500 | -1.04881000 | -0.10903500 |
| H | -2.52187700 | -2.20286800 | -1.64036600 |
| H | -0.45668200 | -0.87653100 | -1.58653300 |
| H | -2.13554900 | 1.65090600  | 1.44877300  |
| H | -4.22416100 | 0.29335900  | 1.42161100  |
| H | -4.41907600 | -1.64127900 | -0.13341200 |
| C | 0.06087700  | 1.39198500  | -0.00032100 |
| O | -0.02391900 | 2.45902900  | 0.62047600  |
| C | 2.24174300  | -1.25847900 | 0.54417900  |
| O | 2.67550700  | -1.87782700 | 1.57278100  |
| C | 2.05186400  | -2.12355400 | -0.71275400 |
| H | 2.92449500  | -2.77792700 | -0.81602400 |

|   |            |             |             |
|---|------------|-------------|-------------|
| H | 1.92631200 | -1.56869900 | -1.64701600 |
| H | 1.17886300 | -2.77823800 | -0.59116900 |
| H | 2.12237200 | 0.64591900  | 1.44973900  |
| H | 1.19921500 | 0.32202100  | -1.48337600 |
| C | 2.25394400 | 2.13876800  | -1.02550900 |
| H | 2.44938300 | 2.79095800  | -0.16985000 |
| H | 1.77144800 | 2.74428000  | -1.80355400 |
| H | 3.21357900 | 1.78161000  | -1.41220200 |

IrH<sup>+</sup>-1 (in H<sub>2</sub>O)

|    |             |             |             |
|----|-------------|-------------|-------------|
| Ir | -0.78228900 | -0.28171800 | 0.01031200  |
| C  | -2.13378200 | -0.76833400 | -1.41906300 |
| C  | -1.88058400 | -2.01108900 | -2.07422500 |
| C  | -3.25175100 | -0.02058500 | -1.81144800 |
| C  | -2.75935400 | -2.43470000 | -3.08607700 |
| C  | -4.08162900 | -0.49386700 | -2.82052600 |
| C  | -3.86412900 | -1.69981700 | -3.47973600 |
| H  | -3.49803100 | 0.92748300  | -1.34854900 |
| F  | -2.54950400 | -3.60780000 | -3.72892400 |
| F  | -5.15160900 | 0.24224000  | -3.18358300 |
| H  | -4.52316300 | -2.05279800 | -4.26261300 |
| N  | 0.00453400  | -2.10015000 | -0.63538200 |
| C  | 1.13674800  | -2.64273300 | -0.15581100 |
| C  | -0.69288400 | -2.73403100 | -1.63251800 |
| C  | 1.63803000  | -3.84864500 | -0.62230200 |
| C  | -0.22219000 | -3.96036600 | -2.13359500 |
| C  | 0.93967300  | -4.52066700 | -1.62978800 |
| H  | 1.64998900  | -2.08692800 | 0.61561700  |
| H  | 1.30627900  | -5.46323900 | -2.02124000 |
| N  | 0.73459100  | 0.68947100  | -1.27351200 |
| C  | 1.80260400  | 1.21905700  | -0.63728600 |
| C  | 0.74449100  | 0.64458200  | -2.62063200 |
| C  | 2.90022600  | 1.70538800  | -1.34345600 |
| C  | 1.80235300  | 1.12150600  | -3.37641000 |
| C  | 2.92964600  | 1.66849200  | -2.74379200 |
| H  | -0.13002800 | 0.20937800  | -3.08962200 |
| H  | 3.73868300  | 2.11124000  | -0.79746200 |
| H  | 1.73595300  | 1.05421800  | -4.45593400 |
| N  | 0.82676600  | 0.21829900  | 1.37594000  |
| C  | 1.10374300  | -0.32418000 | 2.54259400  |
| C  | 1.67248200  | 1.31684300  | 0.88998300  |
| C  | 2.23634700  | -0.00976800 | 3.31879700  |
| C  | 2.95105700  | 1.52861500  | 1.64771500  |
| C  | 3.21329000  | 0.91056200  | 2.84199800  |

|   |             |             |             |
|---|-------------|-------------|-------------|
| H | 2.35747200  | -0.52216300 | 4.26501900  |
| H | 3.62413100  | 2.27885200  | 1.25509200  |
| N | -1.76416600 | 1.44558500  | 0.61034800  |
| C | -2.66252100 | 1.29645300  | 1.63560900  |
| C | -1.56961700 | 2.65159800  | 0.04886200  |
| C | -3.35504300 | 2.42240000  | 2.11378300  |
| C | -2.23877200 | 3.78640900  | 0.48270400  |
| C | -3.14426000 | 3.66640300  | 1.54160600  |
| H | -3.67583200 | 4.53532500  | 1.91359900  |
| C | -2.00431900 | -1.05114300 | 1.42049100  |
| C | -2.79703000 | -0.07917000 | 2.10269400  |
| C | -2.10236300 | -2.39298000 | 1.80891000  |
| C | -3.63797800 | -0.50519500 | 3.14411300  |
| C | -2.95576000 | -2.74942900 | 2.84730600  |
| C | -3.73776900 | -1.82884500 | 3.53765600  |
| H | -1.52645700 | -3.17257500 | 1.32401800  |
| H | -4.39579000 | -2.12621500 | 4.34413200  |
| H | -0.86081500 | 2.69336500  | -0.76707600 |
| H | 0.41159300  | -1.08601800 | 2.89197200  |
| C | 4.48558900  | 1.16141600  | 3.66478400  |
| C | 4.11387200  | 2.19166000  | -3.56673000 |
| C | 5.25137600  | 2.72728700  | -2.67783800 |
| H | 4.92457900  | 3.56777000  | -2.05692600 |
| H | 5.65941600  | 1.95034600  | -2.02301000 |
| H | 6.06775500  | 3.08536600  | -3.31170300 |
| C | 3.61831600  | 3.33991900  | -4.47967300 |
| H | 4.45114300  | 3.71721800  | -5.08178200 |
| H | 2.83355400  | 3.00877400  | -5.16587900 |
| H | 3.22324200  | 4.17104200  | -3.88666800 |
| C | 4.66935000  | 1.03940700  | -4.43878400 |
| H | 5.51295300  | 1.40238700  | -5.03459100 |
| H | 5.02366100  | 0.21070100  | -3.81739800 |
| H | 3.91707000  | 0.64850500  | -5.12988000 |
| C | 5.23861500  | -0.17816000 | 3.84924600  |
| H | 6.14431900  | -0.01535700 | 4.44244100  |
| H | 4.63086100  | -0.92384400 | 4.37024800  |
| H | 5.53557900  | -0.59831600 | 2.88287100  |
| C | 5.43125300  | 2.16419600  | 2.97952300  |
| H | 6.32575700  | 2.29836600  | 3.59492900  |
| H | 5.75662400  | 1.80998700  | 1.99587600  |
| H | 4.96548000  | 3.14748800  | 2.85687900  |
| C | 4.08491400  | 1.72502900  | 5.04915500  |
| H | 3.55520700  | 2.67764800  | 4.94705600  |
| H | 3.44000100  | 1.03595400  | 5.60248700  |

|   |             |             |             |
|---|-------------|-------------|-------------|
| H | 4.98213800  | 1.89660600  | 5.65276900  |
| H | -0.77047200 | -4.45818500 | -2.91806800 |
| H | -4.05416600 | 2.30971100  | 2.92787900  |
| C | 2.88422700  | -4.43497500 | -0.02188300 |
| F | 2.59628000  | -5.37874800 | 0.90361600  |
| F | 3.64907000  | -5.03032900 | -0.96191600 |
| F | 3.63848900  | -3.49688400 | 0.58971700  |
| C | -2.02425800 | 5.10334000  | -0.20869400 |
| F | -0.85135600 | 5.13557700  | -0.87629500 |
| F | -3.00119000 | 5.35746200  | -1.10898600 |
| F | -2.02663700 | 6.12696100  | 0.67125900  |
| F | -3.03559800 | -4.04565200 | 3.20863000  |
| F | -4.39871200 | 0.38943500  | 3.81734800  |
| H | 1.06918200  | 2.23607200  | 1.04837900  |

IrH<sup>+</sup>-2 (in H<sub>2</sub>O)

|    |             |             |             |
|----|-------------|-------------|-------------|
| Ir | -0.82274200 | -0.07911800 | -0.00556500 |
| C  | -2.27094500 | -0.36520300 | 1.37210500  |
| C  | -2.73371800 | 0.83247700  | 1.99690200  |
| C  | -2.81686900 | -1.58956800 | 1.77817700  |
| C  | -3.71556600 | 0.73612300  | 2.99729500  |
| C  | -3.78557800 | -1.61641200 | 2.77467200  |
| C  | -4.25815400 | -0.47002800 | 3.40602300  |
| H  | -2.50459200 | -2.52929500 | 1.33809000  |
| F  | -4.17495400 | 1.85030800  | 3.61392500  |
| F  | -4.29808700 | -2.80469700 | 3.15313700  |
| H  | -5.01383500 | -0.51175200 | 4.17998900  |
| N  | -1.17859200 | 1.88940700  | 0.55292400  |
| C  | -0.53679100 | 2.94499800  | 0.02404500  |
| C  | -2.12218800 | 2.07267500  | 1.53098600  |
| C  | -0.78855300 | 4.24538200  | 0.43497700  |
| C  | -2.40706800 | 3.37403200  | 1.97965600  |
| C  | -1.74275000 | 4.46031100  | 1.43435400  |
| H  | 0.19286300  | 2.72960800  | -0.74393400 |
| H  | -1.95800100 | 5.46393800  | 1.78440400  |
| N  | 0.88604600  | -0.08351500 | 1.36563300  |
| C  | 2.10061000  | 0.15636800  | 0.78811000  |
| C  | 0.83203700  | -0.26033300 | 2.69419500  |
| C  | 3.26930100  | 0.20902000  | 1.56738000  |
| C  | 1.95708300  | -0.21666900 | 3.50810600  |
| C  | 3.22522600  | 0.02331800  | 2.95121500  |
| H  | -0.15155200 | -0.44625400 | 3.10997200  |
| H  | 4.21174700  | 0.40137500  | 1.07565200  |
| H  | 1.82705700  | -0.37133600 | 4.57258000  |

|   |             |             |             |
|---|-------------|-------------|-------------|
| N | 0.92817000  | 0.33201800  | -1.28378600 |
| C | 0.87746800  | 0.50446900  | -2.61603300 |
| C | 2.11380900  | 0.35363400  | -0.64984000 |
| C | 2.03217600  | 0.68279700  | -3.42238900 |
| C | 3.40871800  | 0.60708300  | -1.37842700 |
| C | 3.28338800  | 0.71584500  | -2.87961100 |
| H | 1.87478500  | 0.77953200  | -4.48903900 |
| H | 3.86301700  | 1.53084200  | -0.98324500 |
| N | -0.66950000 | -2.07161000 | -0.57628100 |
| C | -1.48788400 | -2.46426200 | -1.60410700 |
| C | 0.17573800  | -2.95061800 | -0.01066400 |
| C | -1.42830200 | -3.79059300 | -2.06625400 |
| C | 0.26430300  | -4.26866000 | -0.43232600 |
| C | -0.55445700 | -4.69332800 | -1.48373200 |
| H | -0.50514600 | -5.71510200 | -1.84407700 |
| C | -2.22381200 | -0.13452100 | -1.46151800 |
| C | -2.35397600 | -1.40225900 | -2.10546500 |
| C | -3.02714700 | 0.92649600  | -1.89860900 |
| C | -3.27943800 | -1.53513400 | -3.15427900 |
| C | -3.92306800 | 0.72983700  | -2.94291700 |
| C | -4.07463600 | -0.49063500 | -3.59371600 |
| H | -2.97238800 | 1.90918700  | -1.44528100 |
| H | -4.77876700 | -0.62452200 | -4.40493600 |
| H | 0.79005100  | -2.57795300 | 0.79685100  |
| H | -0.10908900 | 0.48643200  | -3.06194400 |
| C | 4.56410200  | 0.84765700  | -3.70001100 |
| C | 4.47294800  | 0.07288500  | 3.84229900  |
| C | 5.75374900  | 0.36319900  | 3.03826700  |
| H | 5.95357700  | -0.41298100 | 2.29237500  |
| H | 5.70592700  | 1.33081500  | 2.52805200  |
| H | 6.60909500  | 0.39246000  | 3.71954300  |
| C | 4.63460000  | -1.29320700 | 4.55297400  |
| H | 5.51668900  | -1.26920500 | 5.20095500  |
| H | 3.76918800  | -1.53556500 | 5.17649300  |
| H | 4.76766600  | -2.10135200 | 3.82655500  |
| C | 4.29009700  | 1.18813800  | 4.90046600  |
| H | 5.16991200  | 1.22694900  | 5.55068900  |
| H | 4.17470500  | 2.16714800  | 4.42442300  |
| H | 3.41551400  | 1.01257800  | 5.53328900  |
| C | 4.26802200  | 1.15366500  | -5.18066900 |
| H | 5.21089700  | 1.26354500  | -5.72424100 |
| H | 3.70534200  | 0.34682300  | -5.66019500 |
| H | 3.70449600  | 2.08503400  | -5.29634300 |
| C | 5.44808600  | 1.98494100  | -3.12956400 |

|   |             |             |             |
|---|-------------|-------------|-------------|
| H | 6.33986200  | 2.09915500  | -3.75334700 |
| H | 4.91302600  | 2.94027700  | -3.12637900 |
| H | 5.78686400  | 1.77625500  | -2.11082800 |
| C | 5.34707000  | -0.49067800 | -3.62345800 |
| H | 5.63995800  | -0.74139800 | -2.59966100 |
| H | 4.75230100  | -1.31776800 | -4.02343300 |
| H | 6.26311800  | -0.41085200 | -4.21757100 |
| H | -3.14595700 | 3.52006000  | 2.75220700  |
| H | -2.06736000 | -4.09899300 | -2.87906800 |
| C | -0.08046600 | 5.39908800  | -0.21653600 |
| F | -0.86287600 | 6.00676500  | -1.13774700 |
| F | 0.26013700  | 6.34129200  | 0.68884600  |
| F | 1.04667800  | 5.00797400  | -0.84800700 |
| C | 1.19302000  | -5.22874100 | 0.25534600  |
| F | 2.12088700  | -4.59041900 | 0.99920400  |
| F | 0.52222300  | -6.06260000 | 1.08268500  |
| F | 1.84445800  | -6.00609500 | -0.63660900 |
| F | -4.68605200 | 1.76408100  | -3.35070800 |
| F | -3.42758500 | -2.72132600 | -3.78991800 |
| H | 4.13273800  | -0.17879900 | -1.11733500 |

IrH<sup>+</sup>-3 (in H<sub>2</sub>O)

|    |             |             |             |
|----|-------------|-------------|-------------|
| Ir | 0.68919900  | -0.35056300 | -0.05871600 |
| C  | 1.87227200  | -0.86134100 | -1.62218300 |
| C  | 2.85527900  | 0.11822600  | -1.95762000 |
| C  | 1.79844700  | -2.03001600 | -2.39047000 |
| C  | 3.70760900  | -0.12619100 | -3.04774600 |
| C  | 2.67123900  | -2.21125200 | -3.45712500 |
| C  | 3.63909200  | -1.27742800 | -3.81348900 |
| H  | 1.07458700  | -2.80870700 | -2.17985400 |
| F  | 4.64945500  | 0.78141500  | -3.39718500 |
| F  | 2.58354100  | -3.34219800 | -4.18582600 |
| H  | 4.30995700  | -1.43709900 | -4.64793100 |
| N  | 1.93678200  | 1.31125300  | -0.12337100 |
| C  | 1.84972600  | 2.34626800  | 0.72952300  |
| C  | 2.87959100  | 1.31294500  | -1.11924700 |
| C  | 2.68968600  | 3.44664400  | 0.64545400  |
| C  | 3.74877200  | 2.41057400  | -1.24350700 |
| C  | 3.65684800  | 3.47667900  | -0.36393700 |
| H  | 1.08550200  | 2.28094300  | 1.49165000  |
| H  | 4.32499500  | 4.32515100  | -0.46285200 |
| N  | -0.79395600 | 0.82198400  | -1.17733200 |
| C  | -1.75231100 | 1.43448800  | -0.44056700 |
| C  | -0.77731900 | 1.01660200  | -2.51013200 |

|   |             |             |             |
|---|-------------|-------------|-------------|
| C | -2.70668500 | 2.25789000  | -1.04790100 |
| C | -1.69999000 | 1.81801700  | -3.16049000 |
| C | -2.70502300 | 2.47280600  | -2.42856200 |
| H | 0.00547700  | 0.50346200  | -3.05554900 |
| H | -3.45263400 | 2.73844200  | -0.43220100 |
| H | -1.62266000 | 1.92608000  | -4.23587700 |
| N | -0.64665800 | 0.41448800  | 1.46132600  |
| C | -0.52577200 | 0.17611200  | 2.80110700  |
| C | -1.71703300 | 1.17439500  | 1.02235300  |
| C | -1.41958700 | 0.61664000  | 3.73287900  |
| C | -2.66520700 | 1.64826400  | 1.88993500  |
| C | -2.64608900 | 1.37662200  | 3.35716500  |
| H | -1.22385100 | 0.40347600  | 4.77710500  |
| H | -3.47756500 | 2.25290900  | 1.50962200  |
| N | -0.38190100 | -2.12980200 | -0.03541700 |
| C | 0.14808900  | -3.13747800 | 0.72884800  |
| C | -1.53197700 | -2.31799200 | -0.70370000 |
| C | -0.52478500 | -4.36909900 | 0.80671900  |
| C | -2.22739900 | -3.51704800 | -0.65632100 |
| C | -1.71025200 | -4.56173500 | 0.11606200  |
| H | -2.23142000 | -5.51058100 | 0.18113000  |
| C | 1.87810700  | -1.45639000 | 1.14653000  |
| C | 1.39807800  | -2.77887700 | 1.39088900  |
| C | 3.07071300  | -1.05018500 | 1.75799900  |
| C | 2.13886800  | -3.62034000 | 2.23779100  |
| C | 3.75571900  | -1.93121600 | 2.58700200  |
| C | 3.31679300  | -3.22540800 | 2.84846300  |
| H | 3.48355800  | -0.05979600 | 1.60603700  |
| H | 3.86524700  | -3.89681200 | 3.49673400  |
| H | -1.89381800 | -1.48061700 | -1.28383500 |
| H | 0.35125500  | -0.39046400 | 3.09075100  |
| C | -4.00295400 | 0.70880800  | 3.89391000  |
| C | -3.72695800 | 3.37071200  | -3.13740300 |
| C | -4.74501500 | 3.98399100  | -2.15863700 |
| H | -5.32905700 | 3.21602900  | -1.64092000 |
| H | -4.26098500 | 4.61714500  | -1.40793100 |
| H | -5.44744600 | 4.61232400  | -2.71386400 |
| C | -4.49448300 | 2.52741200  | -4.18480400 |
| H | -5.22393000 | 3.15864600  | -4.70216600 |
| H | -3.82638200 | 2.10293900  | -4.93976300 |
| H | -5.03528300 | 1.70380200  | -3.70771700 |
| C | -2.97227000 | 4.51985200  | -3.84967300 |
| H | -3.68817500 | 5.16228900  | -4.37236500 |
| H | -2.42461500 | 5.13613000  | -3.12939400 |

|   |             |             |             |
|---|-------------|-------------|-------------|
| H | -2.25804200 | 4.14616700  | -4.58924000 |
| C | -3.92469700 | 0.58606300  | 5.42737000  |
| H | -4.88098000 | 0.21980600  | 5.81469500  |
| H | -3.15349400 | -0.11892300 | 5.75018300  |
| H | -3.72342100 | 1.55503100  | 5.89761400  |
| C | -5.19304900 | 1.61854200  | 3.53488300  |
| H | -6.10546600 | 1.22578700  | 3.99501700  |
| H | -5.04588700 | 2.63908500  | 3.90542200  |
| H | -5.37167200 | 1.66640400  | 2.45679000  |
| C | -4.19578100 | -0.68083500 | 3.26363000  |
| H | -4.26577200 | -0.61936600 | 2.17257500  |
| H | -3.36916700 | -1.35327900 | 3.51497900  |
| H | -5.12124800 | -1.13495700 | 3.63285900  |
| H | 4.48729600  | 2.41667300  | -2.02993000 |
| H | -0.11246500 | -5.16217200 | 1.41093400  |
| C | 2.58691000  | 4.55777900  | 1.65178200  |
| F | 3.52378600  | 4.43969200  | 2.62035300  |
| F | 2.77188800  | 5.76392400  | 1.07391300  |
| F | 1.38365600  | 4.57418200  | 2.26346800  |
| C | -3.48516700 | -3.69356500 | -1.45933400 |
| F | -4.06052100 | -2.50931100 | -1.75866600 |
| F | -3.24423100 | -4.32545900 | -2.63099100 |
| F | -4.39395200 | -4.43699400 | -0.79335900 |
| F | 4.90095100  | -1.52139400 | 3.16840700  |
| F | 1.71237900  | -4.87935600 | 2.49412100  |
| H | -2.62537100 | 2.35179300  | 3.87918200  |

IrH<sup>2+</sup> (in H<sub>2</sub>O)

|    |            |             |             |
|----|------------|-------------|-------------|
| Ir | 0.80371100 | -0.09450500 | 0.00349600  |
| C  | 2.23874000 | -0.41229700 | -1.37575800 |
| C  | 2.75927600 | 0.77391300  | -1.97173200 |
| C  | 2.71990400 | -1.65398100 | -1.80399200 |
| C  | 3.73707200 | 0.64937400  | -2.97355600 |
| C  | 3.68845800 | -1.70805000 | -2.80093100 |
| C  | 4.21855500 | -0.57394000 | -3.40663500 |
| H  | 2.36109100 | -2.58600400 | -1.38537800 |
| F  | 4.25080300 | 1.75103800  | -3.56493700 |
| F  | 4.13884300 | -2.91144300 | -3.20231100 |
| H  | 4.97259000 | -0.63724400 | -4.18071600 |
| N  | 1.25328300 | 1.87517400  | -0.50903900 |
| C  | 0.67199200 | 2.95386700  | 0.04447700  |
| C  | 2.21053700 | 2.03144800  | -1.47861400 |
| C  | 0.99980100 | 4.24765100  | -0.33001100 |
| C  | 2.56872400 | 3.32508900  | -1.89480900 |



|   |             |             |             |
|---|-------------|-------------|-------------|
| C | 1.96643600  | 4.43333900  | -1.32305800 |
| H | -0.07236600 | 2.76988200  | 0.80553100  |
| H | 2.23993500  | 5.43152400  | -1.64680900 |
| N | -0.93040600 | 0.02009000  | -1.35073200 |
| C | -2.14201700 | 0.28743200  | -0.77940300 |
| C | -0.88072800 | -0.10838300 | -2.67956500 |
| C | -3.30586200 | 0.41951500  | -1.54685500 |
| C | -2.00883500 | 0.01720900  | -3.49290300 |
| C | -3.26777700 | 0.28918100  | -2.94124000 |
| H | 0.09164800  | -0.32255000 | -3.10673400 |
| H | -4.24531600 | 0.62797800  | -1.05542500 |
| H | -1.87783800 | -0.10315900 | -4.56187000 |
| N | -0.96514500 | 0.32296700  | 1.28952100  |
| C | -0.93249800 | 0.40107100  | 2.64856600  |
| C | -2.14173000 | 0.42054800  | 0.67174200  |
| C | -2.03943400 | 0.55663700  | 3.47701200  |
| C | -3.39171800 | 0.68720600  | 1.43673200  |
| C | -3.30300700 | 0.68556600  | 2.92152900  |
| H | -1.87627600 | 0.57839900  | 4.54560600  |
| H | -3.74939100 | 1.69191000  | 1.14398800  |
| N | 0.59974600  | -2.10498200 | 0.51313800  |
| C | 1.42509900  | -2.55215800 | 1.51274700  |
| C | -0.26229100 | -2.94848600 | -0.08240400 |
| C | 1.35566700  | -3.89701100 | 1.91518700  |
| C | -0.36118300 | -4.28231400 | 0.28086100  |
| C | 0.46504400  | -4.76237400 | 1.30243400  |
| H | 0.41023300  | -5.79921500 | 1.61596600  |
| C | 2.20527100  | -0.23268600 | 1.45288000  |
| C | 2.30943700  | -1.52399000 | 2.05065600  |
| C | 3.02207100  | 0.80010400  | 1.92540200  |
| C | 3.22994100  | -1.70834300 | 3.09654800  |
| C | 3.91270800  | 0.55182200  | 2.96489800  |
| C | 4.04141100  | -0.69259900 | 3.57224400  |
| H | 2.98603800  | 1.79815200  | 1.50634200  |
| H | 4.74081900  | -0.86629200 | 4.37999100  |
| H | -0.88006200 | -2.53723800 | -0.86796300 |
| H | 0.05915100  | 0.32666700  | 3.08247300  |
| C | -4.56293700 | 0.79669400  | 3.74339900  |
| C | -4.50841400 | 0.42465200  | -3.83026500 |
| C | -5.77382100 | 0.74803300  | -3.01504500 |
| H | -6.01471100 | -0.04477900 | -2.29937600 |
| H | -5.68202900 | 1.69457400  | -2.47204300 |
| H | -6.62413100 | 0.84261700  | -3.69580000 |
| C | -4.72702300 | -0.91250200 | -4.58089200 |

|   |             |             |             |
|---|-------------|-------------|-------------|
| H | -5.60627400 | -0.82733400 | -5.22663000 |
| H | -3.87335100 | -1.17339000 | -5.21290000 |
| H | -4.89767300 | -1.73528800 | -3.87956400 |
| C | -4.26831000 | 1.56360600  | -4.85160200 |
| H | -5.14474500 | 1.66153300  | -5.49927000 |
| H | -4.10933200 | 2.52082000  | -4.34541000 |
| H | -3.40297000 | 1.36719300  | -5.49081700 |
| C | -4.28915000 | 1.38314100  | 5.14490900  |
| H | -5.23901200 | 1.47343200  | 5.67762000  |
| H | -3.64121300 | 0.74157100  | 5.74729300  |
| H | -3.84000000 | 2.37836900  | 5.08170600  |
| C | -5.64722500 | 1.63938200  | 3.03452100  |
| H | -6.52807300 | 1.68798700  | 3.67882500  |
| H | -5.30444800 | 2.66383300  | 2.85725100  |
| H | -5.96655900 | 1.20427000  | 2.08436500  |
| C | -5.08096000 | -0.67374800 | 3.90091200  |
| H | -5.33408200 | -1.12253500 | 2.93678100  |
| H | -4.34577900 | -1.30671200 | 4.40367900  |
| H | -5.98740400 | -0.64090300 | 4.51203500  |
| H | 3.31723700  | 3.44770000  | -2.66198100 |
| H | 2.00190900  | -4.24977900 | 2.70382100  |
| C | 0.36009700  | 5.42297300  | 0.35517100  |
| F | 1.17888800  | 5.95760400  | 1.28829100  |
| F | 0.07181000  | 6.40521800  | -0.52377300 |
| F | -0.78567200 | 5.07795700  | 0.98023100  |
| C | -1.31264600 | -5.20155200 | -0.43330700 |
| F | -2.19774100 | -4.52116300 | -1.19138900 |
| F | -0.65601700 | -6.05542200 | -1.24893700 |
| F | -2.01279000 | -5.95526300 | 0.44104500  |
| F | 4.68959700  | 1.55791800  | 3.40777700  |
| F | 3.35344700  | -2.91597700 | 3.69111500  |
| H | -4.19829400 | 0.02371600  | 1.10050900  |

IrIII (in H<sub>2</sub>O)

|    |             |            |            |
|----|-------------|------------|------------|
| Ir | 0.00000000  | 0.00000000 | 0.80565000 |
| C  | -0.09440000 | 1.41623800 | 2.24319300 |
| C  | -1.41715300 | 1.86193500 | 2.54376300 |
| C  | 0.98256700  | 2.00052600 | 2.92197300 |
| C  | -1.58707000 | 2.87136100 | 3.50620900 |
| C  | 0.74669900  | 2.99634500 | 3.86262000 |
| C  | -0.52797400 | 3.45563400 | 4.17947900 |
| H  | 2.00702800  | 1.70021800 | 2.73554000 |
| F  | -2.82650300 | 3.32031400 | 3.81458500 |
| F  | 1.79632600  | 3.54797100 | 4.50436700 |

|   |             |             |             |
|---|-------------|-------------|-------------|
| H | -0.69113800 | 4.23186700  | 4.91613700  |
| N | -2.05770300 | 0.26516800  | 0.91141600  |
| C | -2.94163900 | -0.42198000 | 0.16809400  |
| C | -2.49313000 | 1.21450600  | 1.80035200  |
| C | -4.30886900 | -0.20566700 | 0.25549600  |
| C | -3.87013100 | 1.47082100  | 1.91689300  |
| C | -4.77893900 | 0.76365500  | 1.14703400  |
| H | -2.53241200 | -1.15906200 | -0.50853200 |
| H | -5.84105200 | 0.96491600  | 1.23353900  |
| N | 0.00000000  | 1.33805100  | -0.93904100 |
| C | -0.02804600 | 0.74129100  | -2.15697900 |
| C | -0.04204400 | 2.68150900  | -0.87885800 |
| C | -0.10875200 | 1.50030900  | -3.32863000 |
| C | -0.11596700 | 3.48088100  | -2.00867100 |
| C | -0.15794500 | 2.89737200  | -3.28502800 |
| H | -0.01256900 | 3.11502400  | 0.11362500  |
| H | -0.14245600 | 0.99290900  | -4.28138400 |
| H | -0.14516100 | 4.55604100  | -1.87675400 |
| N | 0.00000000  | -1.33805100 | -0.93904100 |
| C | 0.04204400  | -2.68150900 | -0.87885800 |
| C | 0.02804600  | -0.74129100 | -2.15697900 |
| C | 0.11596700  | -3.48088100 | -2.00867100 |
| C | 0.10875200  | -1.50030900 | -3.32863000 |
| C | 0.15794500  | -2.89737200 | -3.28502800 |
| H | 0.14516100  | -4.55604100 | -1.87675400 |
| H | 0.14245600  | -0.99290900 | -4.28138400 |
| N | 2.05770300  | -0.26516800 | 0.91141600  |
| C | 2.49313000  | -1.21450600 | 1.80035200  |
| C | 2.94163900  | 0.42198000  | 0.16809400  |
| C | 3.87013100  | -1.47082100 | 1.91689300  |
| C | 4.30886900  | 0.20566700  | 0.25549600  |
| C | 4.77893900  | -0.76365500 | 1.14703400  |
| H | 5.84105200  | -0.96491600 | 1.23353900  |
| C | 0.09440000  | -1.41623800 | 2.24319300  |
| C | 1.41715300  | -1.86193500 | 2.54376300  |
| C | -0.98256700 | -2.00052600 | 2.92197300  |
| C | 1.58707000  | -2.87136100 | 3.50620900  |
| C | -0.74669900 | -2.99634500 | 3.86262000  |
| C | 0.52797400  | -3.45563400 | 4.17947900  |
| H | -2.00702800 | -1.70021800 | 2.73554000  |
| H | 0.69113800  | -4.23186700 | 4.91613700  |
| H | 2.53241200  | 1.15906200  | -0.50853200 |
| H | 0.01256900  | -3.11502400 | 0.11362500  |
| C | 0.25842200  | -3.77098700 | -4.54173900 |

|   |             |             |             |
|---|-------------|-------------|-------------|
| C | -0.25842200 | 3.77098700  | -4.54173900 |
| C | -0.29426200 | 2.93459500  | -5.83395800 |
| H | 0.61451100  | 2.33721700  | -5.96068200 |
| H | -1.15854200 | 2.26297400  | -5.86284800 |
| H | -0.36992200 | 3.60433100  | -6.69545700 |
| C | 0.96807400  | 4.71438600  | -4.59610000 |
| H | 0.90560500  | 5.34877300  | -5.48609800 |
| H | 1.01954100  | 5.37066900  | -3.72259800 |
| H | 1.90110800  | 4.14435100  | -4.64930400 |
| C | -1.55586800 | 4.61233300  | -4.46118000 |
| H | -1.63904900 | 5.24679200  | -5.34938200 |
| H | -2.44030600 | 3.96868600  | -4.41845700 |
| H | -1.56724500 | 5.26468400  | -3.58331600 |
| C | -0.96807400 | -4.71438600 | -4.59610000 |
| H | -0.90560500 | -5.34877300 | -5.48609800 |
| H | -1.01954100 | -5.37066900 | -3.72259800 |
| H | -1.90110800 | -4.14435100 | -4.64930400 |
| C | 0.29426200  | -2.93459500 | -5.83395800 |
| H | 0.36992200  | -3.60433100 | -6.69545700 |
| H | -0.61451100 | -2.33721700 | -5.96068200 |
| H | 1.15854200  | -2.26297400 | -5.86284800 |
| C | 1.55586800  | -4.61233300 | -4.46118000 |
| H | 2.44030600  | -3.96868600 | -4.41845700 |
| H | 1.56724500  | -5.26468400 | -3.58331600 |
| H | 1.63904900  | -5.24679200 | -5.34938200 |
| H | -4.21341100 | 2.22337700  | 2.60966100  |
| H | 4.21341100  | -2.22337700 | 2.60966100  |
| C | -5.26095500 | -1.03399700 | -0.56008000 |
| F | -5.78285500 | -2.05032900 | 0.16425900  |
| F | -6.30051800 | -0.29514900 | -1.00284000 |
| F | -4.65754500 | -1.58265600 | -1.63605300 |
| C | 5.26095500  | 1.03399700  | -0.56008000 |
| F | 4.65754500  | 1.58265600  | -1.63605300 |
| F | 5.78285500  | 2.05032900  | 0.16425900  |
| F | 6.30051800  | 0.29514900  | -1.00284000 |
| F | -1.79632600 | -3.54797100 | 4.50436700  |
| F | 2.82650300  | -3.32031400 | 3.81458500  |

IrII (in H<sub>2</sub>O)

|    |             |            |            |
|----|-------------|------------|------------|
| Ir | 0.00000000  | 0.00000000 | 0.81859500 |
| C  | 0.22534200  | 1.41082900 | 2.25446700 |
| C  | -0.96605100 | 2.14497500 | 2.54839900 |
| C  | 1.39816700  | 1.74010900 | 2.95082000 |
| C  | -0.91467900 | 3.16483100 | 3.51307400 |

|   |             |             |             |
|---|-------------|-------------|-------------|
| C | 1.38310100  | 2.76052700  | 3.89273200  |
| C | 0.24116800  | 3.49588400  | 4.19931700  |
| H | 2.33084400  | 1.21651100  | 2.77200600  |
| F | -2.02602500 | 3.88204700  | 3.81343800  |
| F | 2.52414000  | 3.06287500  | 4.54935600  |
| H | 0.24933400  | 4.28767400  | 4.93747400  |
| N | -1.93380100 | 0.73298200  | 0.90770500  |
| C | -2.93657300 | 0.27230900  | 0.14169000  |
| C | -2.15378700 | 1.75635200  | 1.79421400  |
| C | -4.21990300 | 0.79551000  | 0.21007900  |
| C | -3.43981300 | 2.31604700  | 1.89599200  |
| C | -4.47358900 | 1.83773100  | 1.10757900  |
| H | -2.68303000 | -0.53022400 | -0.53774900 |
| H | -5.46426300 | 2.27268100  | 1.18167200  |
| N | 0.35641900  | 1.29517000  | -0.88892100 |
| C | 0.18719400  | 0.68899200  | -2.13080300 |
| C | 0.69212000  | 2.60148600  | -0.84651200 |
| C | 0.40243200  | 1.46262000  | -3.31163300 |
| C | 0.89674100  | 3.38001600  | -1.96588500 |
| C | 0.75401500  | 2.79489700  | -3.26402600 |
| H | 0.80310100  | 3.02146700  | 0.14812500  |
| H | 0.28232000  | 0.97283500  | -4.26831500 |
| H | 1.16707700  | 4.42137800  | -1.83856600 |
| N | -0.35641900 | -1.29517000 | -0.88892100 |
| C | -0.69212000 | -2.60148600 | -0.84651200 |
| C | -0.18719400 | -0.68899200 | -2.13080300 |
| C | -0.89674100 | -3.38001600 | -1.96588500 |
| C | -0.40243200 | -1.46262000 | -3.31163300 |
| C | -0.75401500 | -2.79489700 | -3.26402600 |
| H | -1.16707700 | -4.42137800 | -1.83856600 |
| H | -0.28232000 | -0.97283500 | -4.26831500 |
| N | 1.93380100  | -0.73298200 | 0.90770500  |
| C | 2.15378700  | -1.75635200 | 1.79421400  |
| C | 2.93657300  | -0.27230900 | 0.14169000  |
| C | 3.43981300  | -2.31604700 | 1.89599200  |
| C | 4.21990300  | -0.79551000 | 0.21007900  |
| C | 4.47358900  | -1.83773100 | 1.10757900  |
| H | 5.46426300  | -2.27268100 | 1.18167200  |
| C | -0.22534200 | -1.41082900 | 2.25446700  |
| C | 0.96605100  | -2.14497500 | 2.54839900  |
| C | -1.39816700 | -1.74010900 | 2.95082000  |
| C | 0.91467900  | -3.16483100 | 3.51307400  |
| C | -1.38310100 | -2.76052700 | 3.89273200  |
| C | -0.24116800 | -3.49588400 | 4.19931700  |

|   |             |             |             |
|---|-------------|-------------|-------------|
| H | -2.33084400 | -1.21651100 | 2.77200600  |
| H | -0.24933400 | -4.28767400 | 4.93747400  |
| H | 2.68303000  | 0.53022400  | -0.53774900 |
| H | -0.80310100 | -3.02146700 | 0.14812500  |
| C | -0.99338800 | -3.64997000 | -4.51580800 |
| C | 0.99338800  | 3.64997000  | -4.51580800 |
| C | 0.80100500  | 2.85354800  | -5.81958600 |
| H | 1.49987900  | 2.01347200  | -5.89058000 |
| H | -0.21704200 | 2.46032200  | -5.90946500 |
| H | 0.98055800  | 3.50698700  | -6.67935300 |
| C | 2.44115200  | 4.19782500  | -4.48959200 |
| H | 2.62373800  | 4.82482000  | -5.36937400 |
| H | 2.63051500  | 4.80674600  | -3.60071100 |
| H | 3.16892600  | 3.37940300  | -4.49893600 |
| C | 0.00000000  | 4.83747500  | -4.51988000 |
| H | 0.17180900  | 5.46994700  | -5.39782300 |
| H | -1.03504400 | 4.48116100  | -4.55535600 |
| H | 0.11054600  | 5.46383200  | -3.62980800 |
| C | -2.44115200 | -4.19782500 | -4.48959200 |
| H | -2.62373800 | -4.82482000 | -5.36937400 |
| H | -2.63051500 | -4.80674600 | -3.60071100 |
| H | -3.16892600 | -3.37940300 | -4.49893600 |
| C | -0.80100500 | -2.85354800 | -5.81958600 |
| H | -0.98055800 | -3.50698700 | -6.67935300 |
| H | -1.49987900 | -2.01347200 | -5.89058000 |
| H | 0.21704200  | -2.46032200 | -5.90946500 |
| C | 0.00000000  | -4.83747500 | -4.51988000 |
| H | 1.03504400  | -4.48116100 | -4.55535600 |
| H | -0.11054600 | -5.46383200 | -3.62980800 |
| H | -0.17180900 | -5.46994700 | -5.39782300 |
| H | -3.61414700 | 3.12297300  | 2.59079800  |
| H | 3.61414700  | -3.12297300 | 2.59079800  |
| C | -5.31963700 | 0.21517900  | -0.63090600 |
| F | -6.06280900 | -0.67857600 | 0.06373800  |
| F | -6.16879500 | 1.17280500  | -1.06392500 |
| F | -4.84043900 | -0.42972700 | -1.71636700 |
| C | 5.31963700  | -0.21517900 | -0.63090600 |
| F | 4.84043900  | 0.42972700  | -1.71636700 |
| F | 6.06280900  | 0.67857600  | 0.06373800  |
| F | 6.16879500  | -1.17280500 | -1.06392500 |
| F | -2.52414000 | -3.06287500 | 4.54935600  |
| F | 2.02602500  | -3.88204700 | 3.81343800  |

IrH<sub>3</sub> (in H<sub>2</sub>O)

|    |             |             |             |
|----|-------------|-------------|-------------|
| Ir | 0.83463600  | -0.31808900 | -0.03737200 |
| C  | 2.06576300  | -0.84166100 | 1.49965400  |
| C  | 1.68561600  | -2.03043100 | 2.19468000  |
| C  | 3.22643700  | -0.17110000 | 1.92072300  |
| C  | 2.48792400  | -2.48538500 | 3.25561400  |
| C  | 3.97278000  | -0.66756500 | 2.97993400  |
| C  | 3.63299500  | -1.82814100 | 3.67072200  |
| H  | 3.56830000  | 0.73529500  | 1.43315800  |
| F  | 2.16262700  | -3.61608600 | 3.93205200  |
| F  | 5.08688500  | -0.00671200 | 3.36585500  |
| H  | 4.23022100  | -2.20420900 | 4.49153800  |
| N  | -0.16181100 | -2.00726200 | 0.69552400  |
| C  | -1.35036200 | -2.44187100 | 0.24231700  |
| C  | 0.44471500  | -2.65373600 | 1.74631200  |
| C  | -1.98962600 | -3.55403200 | 0.77564600  |
| C  | -0.16290400 | -3.79100200 | 2.30707000  |
| C  | -1.37698900 | -4.24751300 | 1.82205000  |
| H  | -1.79328000 | -1.87830700 | -0.57096600 |
| H  | -1.84951300 | -5.11969000 | 2.26022100  |
| N  | -0.65079000 | 0.84928700  | 1.11633400  |
| C  | -1.59602900 | 1.47556500  | 0.37542400  |
| C  | -0.77581600 | 0.83486700  | 2.45740400  |
| C  | -2.68594600 | 2.09482200  | 0.99131400  |
| C  | -1.83711000 | 1.43204300  | 3.11723900  |
| C  | -2.84108600 | 2.08446800  | 2.38274300  |
| H  | 0.00782500  | 0.32151800  | 3.00358500  |
| H  | -3.42006300 | 2.58501200  | 0.36739600  |
| H  | -1.87171800 | 1.37676700  | 4.19919400  |
| N  | -0.60008700 | 0.29874100  | -1.54780300 |
| C  | -1.32896200 | -0.57537300 | -2.31184900 |
| C  | -1.29886400 | 1.51701700  | -1.12746400 |
| C  | -2.63264300 | -0.47047800 | -2.68623900 |
| C  | -2.48504600 | 1.89054400  | -2.03955500 |
| C  | -3.46681000 | 0.72081400  | -2.26645500 |
| H  | -3.04726000 | -1.23088900 | -3.33953800 |
| H  | -2.98178100 | 2.78078500  | -1.64374600 |
| N  | 2.00139600  | 1.25656600  | -0.68349000 |
| C  | 2.90332900  | 0.96851600  | -1.67674200 |
| C  | 1.92629300  | 2.50154500  | -0.18246700 |
| C  | 3.71948200  | 1.99363700  | -2.18888200 |
| C  | 2.72031100  | 3.53944400  | -0.64878800 |
| C  | 3.62989500  | 3.27821400  | -1.67983300 |
| H  | 4.25634700  | 4.06960000  | -2.07638900 |
| C  | 2.01774700  | -1.28284100 | -1.34196500 |

|   |             |             |             |
|---|-------------|-------------|-------------|
| C | 2.91526500  | -0.43628800 | -2.06411900 |
| C | 2.00606100  | -2.65425900 | -1.64219100 |
| C | 3.73599000  | -1.00439700 | -3.05231100 |
| C | 2.84496400  | -3.15268200 | -2.62934500 |
| C | 3.72355800  | -2.35423000 | -3.35827100 |
| H | 1.34737600  | -3.34331800 | -1.12548900 |
| H | 4.36853800  | -2.76333300 | -4.12536800 |
| H | 1.20440500  | 2.65531300  | 0.60890000  |
| H | -0.75475000 | -1.44187000 | -2.64535300 |
| C | -4.64606900 | 1.05548900  | -3.24530300 |
| C | -4.03194200 | 2.73555600  | 3.10001100  |
| C | -5.00041900 | 3.42392800  | 2.12007000  |
| H | -4.51081400 | 4.22604300  | 1.55814000  |
| H | -5.43236400 | 2.71592900  | 1.40516300  |
| H | -5.82726900 | 3.87038100  | 2.68063700  |
| C | -3.50602600 | 3.79721100  | 4.09620900  |
| H | -4.34741100 | 4.26643800  | 4.61650400  |
| H | -2.84931400 | 3.35950900  | 4.85365600  |
| H | -2.94783800 | 4.58230900  | 3.57584900  |
| C | -4.80842800 | 1.64202600  | 3.87332000  |
| H | -5.65840400 | 2.09050100  | 4.39832100  |
| H | -5.19520200 | 0.87829000  | 3.19067900  |
| H | -4.17999400 | 1.14479300  | 4.61789900  |
| C | -5.62499900 | -0.13834300 | -3.27601300 |
| H | -6.48939400 | 0.09044600  | -3.91001500 |
| H | -5.15916000 | -1.04517900 | -3.67279100 |
| H | -5.99923300 | -0.36610200 | -2.27074300 |
| C | -5.42662300 | 2.28666900  | -2.73894800 |
| H | -6.32359400 | 2.44766400  | -3.34783200 |
| H | -5.75127400 | 2.15015700  | -1.70013100 |
| H | -4.83137700 | 3.20375000  | -2.78834200 |
| C | -4.14652900 | 1.32978100  | -4.67761200 |
| H | -3.50695700 | 2.21763200  | -4.72233800 |
| H | -3.57273200 | 0.48321000  | -5.06742200 |
| H | -4.99406900 | 1.50259800  | -5.35098900 |
| H | 0.31897600  | -4.29950800 | 3.12756100  |
| H | 4.41921500  | 1.76878700  | -2.97917800 |
| C | -3.29078000 | -4.02196300 | 0.19148800  |
| F | -3.10221700 | -4.93446100 | -0.79222700 |
| F | -4.06909700 | -4.61284200 | 1.12507200  |
| F | -3.99870100 | -3.00605700 | -0.34820600 |
| C | 2.63324700  | 4.89931700  | -0.01987500 |
| F | 1.44624800  | 5.09899400  | 0.59328700  |
| F | 3.59548700  | 5.08125200  | 0.91562200  |



|   |             |             |             |
|---|-------------|-------------|-------------|
| F | 2.79178500  | 5.87987300  | -0.93560300 |
| F | 2.81582100  | -4.47480300 | -2.90705900 |
| F | 4.59217100  | -0.22688000 | -3.76133400 |
| H | -0.58452100 | 2.35352300  | -1.21850300 |
| H | -2.05499800 | 2.18370700  | -3.00323000 |
| H | -3.95811000 | 0.51441000  | -1.29782900 |

IrH<sub>3</sub><sup>+</sup> (in H<sub>2</sub>O)

|    |             |             |             |
|----|-------------|-------------|-------------|
| Ir | 0.80344100  | -0.31124200 | -0.02480300 |
| C  | 2.09300900  | -0.81158700 | 1.46126100  |
| C  | 1.75109800  | -1.99918900 | 2.17393800  |
| C  | 3.25302800  | -0.11898600 | 1.83271100  |
| C  | 2.59056800  | -2.42908700 | 3.21637400  |
| C  | 4.04030500  | -0.59471400 | 2.87413800  |
| C  | 3.73783800  | -1.74997800 | 3.58772600  |
| H  | 3.56699800  | 0.78725000  | 1.32945500  |
| F  | 2.29876000  | -3.55264900 | 3.91312900  |
| F  | 5.15257400  | 0.08727900  | 3.21448300  |
| H  | 4.36450400  | -2.10695700 | 4.39497700  |
| N  | -0.12942300 | -2.03037400 | 0.72391100  |
| C  | -1.30128600 | -2.51406500 | 0.27906600  |
| C  | 0.51856200  | -2.65853900 | 1.75830300  |
| C  | -1.89025900 | -3.65206200 | 0.80942300  |
| C  | -0.03875900 | -3.81925000 | 2.32274100  |
| C  | -1.23975000 | -4.32070500 | 1.84956900  |
| H  | -1.77991100 | -1.96933800 | -0.52057700 |
| H  | -1.67240000 | -5.21191200 | 2.29054800  |
| N  | -0.66827000 | 0.84392900  | 1.17414700  |
| C  | -1.65282300 | 1.44760300  | 0.46650800  |
| C  | -0.75079500 | 0.83435400  | 2.51776900  |
| C  | -2.73789000 | 2.04454100  | 1.10261000  |
| C  | -1.80477500 | 1.41486200  | 3.20472200  |
| C  | -2.84589700 | 2.03906100  | 2.50072000  |
| H  | 0.05938500  | 0.34128500  | 3.04264400  |
| H  | -3.50245800 | 2.51669300  | 0.50280700  |
| H  | -1.80312000 | 1.36755500  | 4.28729400  |
| N  | -0.74124400 | 0.23320400  | -1.42856000 |
| C  | -1.26292000 | -0.51103700 | -2.40474800 |
| C  | -1.40837500 | 1.49401600  | -1.04440600 |
| C  | -2.54101900 | -0.34112400 | -2.92571000 |
| C  | -2.57176900 | 1.90424600  | -1.96530800 |
| C  | -3.45839200 | 0.72070800  | -2.40085500 |
| H  | -2.87294500 | -1.04851500 | -3.67727000 |
| H  | -3.15420100 | 2.69031600  | -1.48448600 |

|   |             |             |             |
|---|-------------|-------------|-------------|
| N | 1.94541600  | 1.28435500  | -0.69152600 |
| C | 2.84380200  | 1.00110500  | -1.68833600 |
| C | 1.86323300  | 2.52695000  | -0.18415400 |
| C | 3.65049400  | 2.03144300  | -2.20116800 |
| C | 2.64846500  | 3.56986200  | -0.65294000 |
| C | 3.55399700  | 3.31459200  | -1.68762900 |
| H | 4.17494700  | 4.10981300  | -2.08503800 |
| C | 1.97245200  | -1.26174000 | -1.36740800 |
| C | 2.85732500  | -0.40250700 | -2.08542600 |
| C | 1.95205700  | -2.62557800 | -1.68239400 |
| C | 3.66660200  | -0.95651800 | -3.09091000 |
| C | 2.77991300  | -3.11149100 | -2.68868900 |
| C | 3.64899200  | -2.30284400 | -3.41413900 |
| H | 1.30248900  | -3.32256800 | -1.16567600 |
| H | 4.28501000  | -2.70085200 | -4.19444300 |
| H | 1.14995200  | 2.67364300  | 0.61642600  |
| H | -0.65378500 | -1.34973700 | -2.73368500 |
| C | -4.63020200 | 1.08715700  | -3.37669100 |
| C | -4.02664400 | 2.66992400  | 3.25026200  |
| C | -5.04684100 | 3.31698800  | 2.29559100  |
| H | -4.59984900 | 4.12528900  | 1.70780600  |
| H | -5.48405100 | 2.58720100  | 1.60626800  |
| H | -5.86534300 | 3.74777300  | 2.87960300  |
| C | -3.49024100 | 3.76017400  | 4.20984000  |
| H | -4.32444200 | 4.21347100  | 4.75476500  |
| H | -2.79364600 | 3.35193200  | 4.94771600  |
| H | -2.97509800 | 4.55192400  | 3.65653600  |
| C | -4.74372600 | 1.56750800  | 4.06761400  |
| H | -5.58499100 | 2.00333000  | 4.61617700  |
| H | -5.13531800 | 0.78331200  | 3.41159000  |
| H | -4.07597300 | 1.09917500  | 4.79638800  |
| C | -5.52485500 | -0.15514000 | -3.57343100 |
| H | -6.37301500 | 0.09187500  | -4.22028300 |
| H | -4.99265300 | -0.98756200 | -4.04400700 |
| H | -5.92491800 | -0.50928000 | -2.61667600 |
| C | -5.49532300 | 2.20227400  | -2.75403100 |
| H | -6.38488800 | 2.37197700  | -3.36937600 |
| H | -5.83387100 | 1.92922500  | -1.74775600 |
| H | -4.96054300 | 3.15444900  | -2.68752800 |
| C | -4.09986000 | 1.55723200  | -4.74633000 |
| H | -3.49736300 | 2.46719700  | -4.66212700 |
| H | -3.48655400 | 0.78956400  | -5.23045400 |
| H | -4.93725500 | 1.78129700  | -5.41539400 |
| H | 0.47346400  | -4.31286200 | 3.13370300  |

|   |             |             |             |
|---|-------------|-------------|-------------|
| H | 4.34887300  | 1.81386500  | -2.99442300 |
| C | -3.17863600 | -4.17020200 | 0.23568800  |
| F | -2.96271300 | -5.14189800 | -0.68036800 |
| F | -3.96494200 | -4.70335900 | 1.19440100  |
| F | -3.88236200 | -3.19547900 | -0.38036800 |
| C | 2.55753200  | 4.92971800  | -0.01963000 |
| F | 1.37670200  | 5.11461000  | 0.60781100  |
| F | 3.53042100  | 5.11461500  | 0.90169300  |
| F | 2.69504500  | 5.90978600  | -0.93732600 |
| F | 2.74474800  | -4.42667000 | -2.98173200 |
| F | 4.51229000  | -0.17064000 | -3.79731000 |
| H | -0.63451800 | 2.26484200  | -1.17159900 |
| H | -2.12726300 | 2.35696900  | -2.85648600 |
| H | -3.93960500 | 0.30798100  | -1.49657100 |

R\* (in ACN)

|   |             |             |             |
|---|-------------|-------------|-------------|
| C | 2.29214700  | -0.57996200 | -0.02298300 |
| C | 1.02753100  | -0.00739800 | 0.52442200  |
| C | -3.05352400 | 1.63288200  | -0.02871800 |
| C | -1.76931200 | 1.11639700  | 0.14311300  |
| C | -1.52673000 | -0.25635100 | -0.03259300 |
| C | -2.59810300 | -1.09731900 | -0.38399200 |
| C | -3.87677900 | -0.58008000 | -0.56040400 |
| C | -4.10729900 | 0.78817200  | -0.38223000 |
| H | -3.22957200 | 2.69455200  | 0.11231600  |
| H | -0.96810100 | 1.79235600  | 0.41905600  |
| H | -2.40204900 | -2.15564800 | -0.51514400 |
| H | -4.69488400 | -1.23860800 | -0.83534800 |
| H | -5.10534700 | 1.19350500  | -0.51856800 |
| C | -0.18012400 | -0.88486900 | 0.14096600  |
| O | -0.03642300 | -2.09586800 | 0.02380200  |
| C | 3.42284400  | 0.16788600  | -0.50824800 |
| O | 4.43573600  | -0.44424500 | -0.89920700 |
| C | 3.37527300  | 1.68544700  | -0.55035700 |
| H | 4.34008600  | 2.06260400  | -0.89182100 |
| H | 3.15224000  | 2.10793800  | 0.43500000  |
| H | 2.59502600  | 2.03329300  | -1.23674000 |
| H | 2.39012500  | -1.66132700 | -0.03716000 |
| H | 0.88722300  | 1.00851100  | 0.14934300  |
| C | 1.08450700  | 0.05847000  | 2.08340600  |
| H | 1.22550900  | -0.94269500 | 2.49877900  |
| H | 0.15677100  | 0.47608700  | 2.48472900  |
| H | 1.91587900  | 0.69068800  | 2.40449900  |

R<sup>⊖</sup> (in ACN)

|   |             |             |             |
|---|-------------|-------------|-------------|
| C | 1.96079800  | 0.10479500  | 0.51485800  |
| C | 1.38597900  | 0.94471300  | -0.60540000 |
| C | -2.44376300 | -1.35861200 | -0.95729800 |
| C | -1.27027900 | -0.60487400 | -0.92485000 |
| C | -1.13953300 | 0.48260500  | -0.04438800 |
| C | -2.22619100 | 0.79675300  | 0.79019000  |
| C | -3.39512200 | 0.03961300  | 0.76610300  |
| C | -3.50913400 | -1.04366500 | -0.10979200 |
| H | -2.52638700 | -2.19387100 | -1.64688900 |
| H | -0.45891900 | -0.87110000 | -1.59179900 |
| H | -2.12827800 | 1.64868200  | 1.45457100  |
| H | -4.21912000 | 0.29427500  | 1.42688800  |
| H | -4.42009900 | -1.63464300 | -0.13453800 |
| C | 0.06452100  | 1.39208400  | 0.00011400  |
| O | -0.01938300 | 2.45910200  | 0.62115200  |
| C | 2.23694000  | -1.26214900 | 0.54437400  |
| O | 2.66884000  | -1.88308500 | 1.57220100  |
| C | 2.04206100  | -2.12647800 | -0.71259400 |
| H | 2.90864300  | -2.78924000 | -0.81278200 |
| H | 1.92445200  | -1.57099800 | -1.64761400 |
| H | 1.16225300  | -2.77234100 | -0.59295700 |
| H | 2.12473100  | 0.64349200  | 1.44928100  |
| H | 1.20117700  | 0.32113800  | -1.48375400 |
| C | 2.25830400  | 2.13642800  | -1.02520700 |
| H | 2.45258700  | 2.78893000  | -0.16953700 |
| H | 1.77747800  | 2.74197200  | -1.80433200 |
| H | 3.21834100  | 1.77827600  | -1.41002100 |

IrH<sup>+</sup>-1 (in ACN)

|    |             |             |             |
|----|-------------|-------------|-------------|
| Ir | -0.78254000 | -0.28066600 | 0.01024100  |
| C  | -2.13469100 | -0.76625800 | -1.41887200 |
| C  | -1.88350700 | -2.01008900 | -2.07276500 |
| C  | -3.25124100 | -0.01699400 | -1.81209500 |
| C  | -2.76287600 | -2.43324700 | -3.08435500 |
| C  | -4.08189900 | -0.48988900 | -2.82080500 |
| C  | -3.86628900 | -1.69684600 | -3.47883100 |
| H  | -3.49632000 | 0.93175200  | -1.34995200 |
| F  | -2.55469900 | -3.60720300 | -3.72600800 |
| F  | -5.15037200 | 0.24762700  | -3.18461900 |
| H  | -4.52592400 | -2.04949600 | -4.26134800 |
| N  | 0.00161600  | -2.10057200 | -0.63412500 |
| C  | 1.13325100  | -2.64422100 | -0.15444300 |

|   |             |             |             |
|---|-------------|-------------|-------------|
| C | -0.69719900 | -2.73458200 | -1.63023900 |
| C | 1.63251000  | -3.85155000 | -0.61937400 |
| C | -0.22875500 | -3.96257700 | -2.12952500 |
| C | 0.93238700  | -4.52405600 | -1.62537500 |
| H | 1.64776000  | -2.08793400 | 0.61583800  |
| H | 1.29726000  | -5.46788800 | -2.01544200 |
| N | 0.73625600  | 0.68715900  | -1.27417500 |
| C | 1.80504400  | 1.21576400  | -0.63839600 |
| C | 0.74618300  | 0.64100200  | -2.62125800 |
| C | 2.90311900  | 1.70044300  | -1.34506300 |
| C | 1.80467400  | 1.11586400  | -3.37746800 |
| C | 2.93256400  | 1.66230200  | -2.74541300 |
| H | -0.12894300 | 0.20649300  | -3.08980400 |
| H | 3.74212400  | 2.10589800  | -0.79958600 |
| H | 1.73836100  | 1.04755100  | -4.45693600 |
| N | 0.82718800  | 0.21832600  | 1.37579400  |
| C | 1.10200400  | -0.32236300 | 2.54385400  |
| C | 1.67521700  | 1.31469600  | 0.88887700  |
| C | 2.23434600  | -0.00848200 | 3.32062500  |
| C | 2.95420500  | 1.52434600  | 1.64664600  |
| C | 3.21392200  | 0.90848400  | 2.84264400  |
| H | 2.35351400  | -0.51891200 | 4.26815400  |
| H | 3.63008400  | 2.27143700  | 1.25284700  |
| N | -1.76214700 | 1.44833100  | 0.60923700  |
| C | -2.66123300 | 1.30088000  | 1.63412000  |
| C | -1.56553300 | 2.65388000  | 0.04741500  |
| C | -3.35225500 | 2.42820700  | 2.11149300  |
| C | -2.23277500 | 3.78999300  | 0.48064200  |
| C | -3.13909500 | 3.67168700  | 1.53912300  |
| H | -3.66948500 | 4.54161900  | 1.91049400  |
| C | -2.00625900 | -1.04766100 | 1.42032400  |
| C | -2.79791500 | -0.07424000 | 2.10169100  |
| C | -2.10646600 | -2.38912400 | 1.80919500  |
| C | -3.64027500 | -0.49863300 | 3.14269800  |
| C | -2.96114700 | -2.74399300 | 2.84716200  |
| C | -3.74221900 | -1.82195300 | 3.53665700  |
| H | -1.53182700 | -3.16993400 | 1.32476400  |
| H | -4.40133600 | -2.11810200 | 4.34268400  |
| H | -0.85678200 | 2.69400600  | -0.76861800 |
| H | 0.40795300  | -1.08217000 | 2.89393100  |
| C | 4.48613800  | 1.15805500  | 3.66595200  |
| C | 4.11733700  | 2.18335800  | -3.56885900 |
| C | 5.25529300  | 2.71887600  | -2.68049200 |
| H | 4.92926000  | 3.56036000  | -2.06051700 |

|   |             |             |             |
|---|-------------|-------------|-------------|
| H | 5.66275000  | 1.94226200  | -2.02489400 |
| H | 6.07202600  | 3.07561600  | -3.31460200 |
| C | 3.62306400  | 3.33105000  | -4.48322900 |
| H | 4.45634300  | 3.70667600  | -5.08571300 |
| H | 2.83803400  | 3.00001400  | -5.16917400 |
| H | 3.22888700  | 4.16340600  | -3.89137000 |
| C | 4.67162900  | 1.02947400  | -4.43953100 |
| H | 5.51555800  | 1.39085600  | -5.03579600 |
| H | 5.02513800  | 0.20108900  | -3.81726300 |
| H | 3.91895600  | 0.63858100  | -5.13020100 |
| C | 5.23621600  | -0.18278700 | 3.85320600  |
| H | 6.14175000  | -0.02094600 | 4.44687400  |
| H | 4.62657800  | -0.92643400 | 4.37491700  |
| H | 5.53319700  | -0.60509200 | 2.88777000  |
| C | 5.43442700  | 2.15767700  | 2.97974200  |
| H | 6.32862700  | 2.29122000  | 3.59566900  |
| H | 5.76014100  | 1.80096100  | 1.99712100  |
| H | 4.97085400  | 3.14173900  | 2.85487900  |
| C | 4.08556000  | 1.72497800  | 5.04901500  |
| H | 3.55773100  | 2.67842200  | 4.94490200  |
| H | 3.43906900  | 1.03818400  | 5.60332100  |
| H | 4.98269300  | 1.89600800  | 5.65286100  |
| H | -0.77838100 | -4.46066300 | -2.91289600 |
| H | -4.05214300 | 2.31678900  | 2.92512400  |
| C | 2.87834900  | -4.43856500 | -0.01872900 |
| F | 2.58974600  | -5.37923100 | 0.90946300  |
| F | 3.64126600  | -5.03719200 | -0.95803000 |
| F | 3.63451000  | -3.49972800 | 0.58971800  |
| C | -2.01544100 | 5.10651400  | -0.21083400 |
| F | -0.84283300 | 5.13533100  | -0.87941200 |
| F | -2.99231100 | 5.36336200  | -1.11007000 |
| F | -2.01392300 | 6.12974000  | 0.66944600  |
| F | -3.04298600 | -4.03977700 | 3.20884200  |
| F | -4.39995900 | 0.39746200  | 3.81499500  |
| H | 1.07348200  | 2.23513500  | 1.04658700  |

IrH<sup>+</sup>-2 (in ACN)

|    |             |             |             |
|----|-------------|-------------|-------------|
| Ir | -0.82294500 | -0.07766700 | -0.00564000 |
| C  | -2.27186300 | -0.35790800 | 1.37247800  |
| C  | -2.73213700 | 0.84194800  | 1.99489800  |
| C  | -2.82028000 | -1.58027200 | 1.78084800  |
| C  | -3.71443700 | 0.74961500  | 2.99528600  |
| C  | -3.78936300 | -1.60322300 | 2.77716000  |
| C  | -4.25961300 | -0.45458800 | 3.40618300  |

|   |             |             |             |
|---|-------------|-------------|-------------|
| H | -2.51007000 | -2.52146600 | 1.34251800  |
| F | -4.17126700 | 1.86596200  | 3.60969700  |
| F | -4.30424000 | -2.78956400 | 3.15774000  |
| H | -5.01566200 | -0.49324000 | 4.17994600  |
| N | -1.17442100 | 1.89271600  | 0.54931100  |
| C | -0.53013800 | 2.94596200  | 0.01879300  |
| C | -2.11800300 | 2.07986300  | 1.52670000  |
| C | -0.77904000 | 4.24768900  | 0.42712500  |
| C | -2.40045600 | 3.38282600  | 1.97246500  |
| C | -1.73351800 | 4.46661500  | 1.42542100  |
| H | 0.19930000  | 2.72756100  | -0.74855100 |
| H | -1.94682200 | 5.47143400  | 1.77325200  |
| N | 0.88591500  | -0.08312500 | 1.36579400  |
| C | 2.10112400  | 0.15319500  | 0.78814600  |
| C | 0.83112400  | -0.25683700 | 2.69474100  |
| C | 3.26957900  | 0.20582300  | 1.56781600  |
| C | 1.95594400  | -0.21323700 | 3.50898600  |
| C | 3.22473300  | 0.02357400  | 2.95212700  |
| H | -0.15300300 | -0.44014800 | 3.11045800  |
| H | 4.21258400  | 0.39551800  | 1.07608900  |
| H | 1.82534500  | -0.36539200 | 4.57375100  |
| N | 0.92958000  | 0.32673100  | -1.28452200 |
| C | 0.87961700  | 0.49645800  | -2.61715100 |
| C | 2.11514400  | 0.34699800  | -0.65033300 |
| C | 2.03486900  | 0.67075800  | -3.42360700 |
| C | 3.41082800  | 0.59606000  | -1.37922000 |
| C | 3.28611900  | 0.70235000  | -2.88071400 |
| H | 1.87794700  | 0.76592900  | -4.49047000 |
| H | 3.86729900  | 1.51955300  | -0.98579600 |
| N | -0.67456900 | -2.07153100 | -0.57280500 |
| C | -1.49492900 | -2.46434600 | -1.59906200 |
| C | 0.16947900  | -2.95129400 | -0.00652300 |
| C | -1.43889200 | -3.79187000 | -2.05845300 |
| C | 0.25491900  | -4.27028700 | -0.42577800 |
| C | -0.56625900 | -4.69529100 | -1.47523900 |
| H | -0.51962700 | -5.71794300 | -1.83347600 |
| C | -2.22473200 | -0.13249500 | -1.46094100 |
| C | -2.35859800 | -1.40129800 | -2.10201900 |
| C | -3.02558100 | 0.92956200  | -1.89978000 |
| C | -3.28530600 | -1.53418000 | -3.14980600 |
| C | -3.92295200 | 0.73290000  | -2.94291800 |
| C | -4.07812700 | -0.48863400 | -3.59089500 |
| H | -2.96846800 | 1.91301500  | -1.44844600 |
| H | -4.78341500 | -0.62251500 | -4.40110500 |

|                              |             |             |             |
|------------------------------|-------------|-------------|-------------|
| H                            | 0.78550400  | -2.57834100 | 0.79957500  |
| H                            | -0.10694000 | 0.47972100  | -3.06317500 |
| C                            | 4.56716700  | 0.83046800  | -3.70119500 |
| C                            | 4.47210800  | 0.07322000  | 3.84369500  |
| C                            | 5.75340500  | 0.36312200  | 3.04028900  |
| H                            | 5.95410400  | -0.41362800 | 2.29522300  |
| H                            | 5.70600000  | 1.33044700  | 2.52944500  |
| H                            | 6.60824800  | 0.39294300  | 3.72213500  |
| C                            | 4.63302600  | -1.29288700 | 4.55454400  |
| H                            | 5.51477200  | -1.26911900 | 5.20295300  |
| H                            | 3.76722900  | -1.53493500 | 5.17763900  |
| H                            | 4.76624500  | -2.10116500 | 3.82829000  |
| C                            | 4.28919900  | 1.18868600  | 4.90162800  |
| H                            | 5.16906200  | 1.22767100  | 5.55171500  |
| H                            | 4.17371600  | 2.16765100  | 4.42550100  |
| H                            | 3.41480600  | 1.01326300  | 5.53473000  |
| C                            | 4.27180200  | 1.13488200  | -5.18234400 |
| H                            | 5.21492500  | 1.24217000  | -5.72594400 |
| H                            | 3.70774800  | 0.32841100  | -5.66085400 |
| H                            | 3.71012900  | 2.06717200  | -5.29949800 |
| C                            | 5.45325700  | 1.96695500  | -3.13243400 |
| H                            | 6.34518200  | 2.07866500  | -3.75641000 |
| H                            | 4.92006300  | 2.92333200  | -3.13070700 |
| H                            | 5.79186700  | 1.75916800  | -2.11345000 |
| C                            | 5.34753400  | -0.50925600 | -3.62261500 |
| H                            | 5.64029000  | -0.75895800 | -2.59851300 |
| H                            | 4.75117500  | -1.33587500 | -4.02119900 |
| H                            | 6.26360000  | -0.43225500 | -4.21703200 |
| H                            | -3.13962200 | 3.53194000  | 2.74418400  |
| H                            | -2.07976400 | -4.10046400 | -2.86977600 |
| C                            | -0.06730600 | 5.39830100  | -0.22609500 |
| F                            | -0.84580800 | 6.00396100  | -1.15162900 |
| F                            | 0.27230800  | 6.34258900  | 0.67728800  |
| F                            | 1.06117000  | 5.00286300  | -0.85285700 |
| C                            | 1.18319600  | -5.23077800 | 0.26209300  |
| F                            | 2.11363100  | -4.59218600 | 1.00275500  |
| F                            | 0.51268500  | -6.06157300 | 1.09238300  |
| F                            | 1.83159000  | -6.01070700 | -0.62967700 |
| F                            | -4.68342700 | 1.76809900  | -3.35226700 |
| F                            | -3.43681200 | -2.72137700 | -3.78260500 |
| H                            | 4.13318500  | -0.19083800 | -1.11640400 |
| IrH <sup>+</sup> -3 (in ACN) |             |             |             |
| Ir                           | 0.68711200  | -0.35328100 | -0.05932600 |



|   |             |             |             |
|---|-------------|-------------|-------------|
| C | 1.86764200  | -0.86543200 | -1.62427400 |
| C | 2.85682900  | 0.10939900  | -1.95546600 |
| C | 1.78695100  | -2.03046700 | -2.39722500 |
| C | 3.70795900  | -0.13578400 | -3.04641900 |
| C | 2.65899600  | -2.21282400 | -3.46438100 |
| C | 3.63255200  | -1.28343000 | -3.81680500 |
| H | 1.05866900  | -2.80586100 | -2.18978200 |
| F | 4.65516000  | 0.76761800  | -3.39196900 |
| F | 2.56453800  | -3.34013800 | -4.19746400 |
| H | 4.30269900  | -1.44394800 | -4.65165600 |
| N | 1.94578900  | 1.30034800  | -0.11623700 |
| C | 1.86548800  | 2.33214900  | 0.74124700  |
| C | 2.88872400  | 1.30020100  | -1.11199800 |
| C | 2.71231500  | 3.42752900  | 0.66200200  |
| C | 3.76508200  | 2.39278300  | -1.23128700 |
| C | 3.67984600  | 3.45564700  | -0.34720400 |
| H | 1.10090500  | 2.26816200  | 1.50311500  |
| H | 4.35342000  | 4.30026700  | -0.44235700 |
| N | -0.78822400 | 0.83361100  | -1.17372000 |
| C | -1.74416800 | 1.44759100  | -0.43501700 |
| C | -0.76792200 | 1.03626200  | -2.50527600 |
| C | -2.69152700 | 2.28157400  | -1.03897600 |
| C | -1.68422700 | 1.84750600  | -3.15245100 |
| C | -2.68610700 | 2.50476800  | -2.41834900 |
| H | 0.01264000  | 0.52142800  | -3.05233900 |
| H | -3.43462900 | 2.76436300  | -0.42153800 |
| H | -1.60433200 | 1.96156600  | -4.22704300 |
| N | -0.64562500 | 0.41332000  | 1.46322500  |
| C | -0.52726500 | 0.16859100  | 2.80208200  |
| C | -1.71340800 | 1.17814100  | 1.02633400  |
| C | -1.42151100 | 0.60678900  | 3.73457400  |
| C | -2.66317900 | 1.64801800  | 1.89435400  |
| C | -2.64664400 | 1.36976400  | 3.36048000  |
| H | -1.22758100 | 0.38876200  | 4.77813200  |
| H | -3.47480000 | 2.25452300  | 1.51534100  |
| N | -0.39512300 | -2.12593900 | -0.04469200 |
| C | 0.12838100  | -3.14039500 | 0.71516200  |
| C | -1.54562300 | -2.30421900 | -0.71494700 |
| C | -0.55193300 | -4.36839300 | 0.78651200  |
| C | -2.24817800 | -3.49936300 | -0.67402400 |
| C | -1.73783200 | -4.55076800 | 0.09381700  |
| H | -2.26465100 | -5.49683000 | 0.15373000  |
| C | 1.86792400  | -1.47158700 | 1.14217200  |
| C | 1.37975400  | -2.79226900 | 1.38000400  |

|   |             |             |             |
|---|-------------|-------------|-------------|
| C | 3.06187600  | -1.07505600 | 1.75712800  |
| C | 2.11463300  | -3.64198800 | 2.22387800  |
| C | 3.74075900  | -1.96383400 | 2.58299300  |
| C | 3.29399000  | -3.25667700 | 2.83783600  |
| H | 3.48080000  | -0.08647200 | 1.61006700  |
| H | 3.83783900  | -3.93423000 | 3.48357800  |
| H | -1.90207000 | -1.46186900 | -1.29128600 |
| H | 0.34809000  | -0.40132000 | 3.09031300  |
| C | -4.00496500 | 0.70138500  | 3.89289700  |
| C | -3.70062300 | 3.41389300  | -3.12356200 |
| C | -4.71622900 | 4.02815000  | -2.14291100 |
| H | -5.30647000 | 3.26106300  | -1.63094500 |
| H | -4.22939100 | 4.65366400  | -1.38761600 |
| H | -5.41345400 | 4.66449100  | -2.69553600 |
| C | -4.47207400 | 2.58196600  | -4.17716900 |
| H | -5.19605000 | 3.22125700  | -4.69225700 |
| H | -3.80563700 | 2.15702400  | -4.93332300 |
| H | -5.01961600 | 1.75955200  | -3.70575700 |
| C | -2.93692400 | 4.56208900  | -3.82767000 |
| H | -3.64754800 | 5.21224900  | -4.34799000 |
| H | -2.38657800 | 5.17059500  | -3.10284700 |
| H | -2.22378200 | 4.18802900  | -4.56808400 |
| C | -3.92795000 | 0.57126500  | 5.42580500  |
| H | -4.88542000 | 0.20585700  | 5.81090400  |
| H | -3.15891900 | -0.13735700 | 5.74580100  |
| H | -3.72433500 | 1.53745200  | 5.90075100  |
| C | -5.19327900 | 1.61480100  | 3.53742500  |
| H | -6.10685400 | 1.22092600  | 3.99422800  |
| H | -5.04510700 | 2.63303900  | 3.91384500  |
| H | -5.37074000 | 1.66895100  | 2.45941700  |
| C | -4.19942600 | -0.68492900 | 3.25588700  |
| H | -4.26933600 | -0.61816900 | 2.16512200  |
| H | -3.37377500 | -1.35970200 | 3.50417000  |
| H | -5.12548700 | -1.13966700 | 3.62277000  |
| H | 4.50385300  | 2.39730500  | -2.01749200 |
| H | -0.14478900 | -5.16673800 | 1.38731400  |
| C | 2.61631200  | 4.53543500  | 1.67264100  |
| F | 3.55565800  | 4.41081400  | 2.63771200  |
| F | 2.80321300  | 5.74288600  | 1.09831400  |
| F | 1.41476400  | 4.55337100  | 2.28786600  |
| C | -3.50585100 | -3.66424100 | -1.47978800 |
| F | -4.07660700 | -2.47490800 | -1.76833800 |
| F | -3.26583300 | -4.28543800 | -2.65716400 |
| F | -4.41767800 | -4.41052000 | -0.82159000 |

|   |             |             |            |
|---|-------------|-------------|------------|
| F | 4.88729900  | -1.56326100 | 3.16775600 |
| F | 1.68036300  | -4.89953400 | 2.47381400 |
| H | -2.62580200 | 2.34262400  | 3.88669300 |

IrH<sup>2+</sup> (in ACN)

|    |             |             |             |
|----|-------------|-------------|-------------|
| Ir | 0.80371400  | -0.09473800 | 0.00349700  |
| C  | 2.23867700  | -0.41275400 | -1.37578400 |
| C  | 2.75934200  | 0.77337900  | -1.97177200 |
| C  | 2.71964300  | -1.65451500 | -1.80403700 |
| C  | 3.73706300  | 0.64871000  | -2.97365500 |
| C  | 3.68817200  | -1.70871300 | -2.80099000 |
| C  | 4.21838300  | -0.57466500 | -3.40672500 |
| H  | 2.36069600  | -2.58647800 | -1.38541500 |
| F  | 4.25086500  | 1.75030800  | -3.56510400 |
| F  | 4.13842900  | -2.91215300 | -3.20237100 |
| H  | 4.97238800  | -0.63806600 | -4.18082900 |
| N  | 1.25380000  | 1.87489400  | -0.50878700 |
| C  | 0.67290500  | 2.95367300  | 0.04495100  |
| C  | 2.21091200  | 2.03100100  | -1.47851700 |
| C  | 1.00097700  | 4.24740500  | -0.32948200 |
| C  | 2.56931800  | 3.32459000  | -1.89471000 |
| C  | 1.96742900  | 4.43294300  | -1.32274000 |
| H  | -0.07141600 | 2.76981200  | 0.80607100  |
| H  | 2.24106400  | 5.43109300  | -1.64649000 |
| N  | -0.93033300 | 0.02038600  | -1.35072100 |
| C  | -2.14188400 | 0.28805400  | -0.77942500 |
| C  | -0.88059400 | -0.10796000 | -2.67955000 |
| C  | -3.30562000 | 0.42056100  | -1.54693600 |
| C  | -2.00862700 | 0.01794700  | -3.49295300 |
| C  | -3.26750700 | 0.29025000  | -2.94133800 |
| H  | 0.09177200  | -0.32231300 | -3.10666600 |
| H  | -4.24502400 | 0.62934200  | -1.05553800 |
| H  | -1.87757400 | -0.10239700 | -4.56191400 |
| N  | -0.96500900 | 0.32315300  | 1.28949200  |
| C  | -0.93232800 | 0.40140800  | 2.64857600  |
| C  | -2.14157900 | 0.42104100  | 0.67175000  |
| C  | -2.03922700 | 0.55743900  | 3.47697400  |
| C  | -3.39150100 | 0.68810400  | 1.43669200  |
| C  | -3.30282300 | 0.68645900  | 2.92150000  |
| H  | -1.87611600 | 0.57928000  | 4.54557000  |
| H  | -3.74871300 | 1.69298200  | 1.14397700  |
| N  | 0.59909800  | -2.10520600 | 0.51291500  |
| C  | 1.42451700  | -2.55281000 | 1.51228900  |
| C  | -0.26345600 | -2.94831400 | -0.08244500 |

|   |             |             |             |
|---|-------------|-------------|-------------|
| C | 1.35469400  | -3.89768500 | 1.91458900  |
| C | -0.36277000 | -4.28213100 | 0.28072000  |
| C | 0.46356600  | -4.76263900 | 1.30199600  |
| H | 0.40841500  | -5.79948900 | 1.61543700  |
| C | 2.20529400  | -0.23351700 | 1.45279100  |
| C | 2.30923700  | -1.52499000 | 2.05024200  |
| C | 3.02235800  | 0.79898500  | 1.92548100  |
| C | 3.22982100  | -1.70979000 | 3.09600200  |
| C | 3.91301900  | 0.55028200  | 2.96485100  |
| C | 4.04151900  | -0.69431600 | 3.57187700  |
| H | 2.98655600  | 1.79711400  | 1.50660100  |
| H | 4.74097800  | -0.86834700 | 4.37950700  |
| H | -0.88131200 | -2.53675400 | -0.86777000 |
| H | 0.05930500  | 0.32676600  | 3.08247600  |
| C | -4.56268500 | 0.79765500  | 3.74340400  |
| C | -4.50807400 | 0.42607100  | -3.83040000 |
| C | -5.77348300 | 0.74930200  | -3.01513300 |
| H | -6.01440200 | -0.04367700 | -2.29965600 |
| H | -5.68168000 | 1.69570900  | -2.47190800 |
| H | -6.62378300 | 0.84406700  | -3.69587600 |
| C | -4.72676800 | -0.91080100 | -4.58147800 |
| H | -5.60594000 | -0.82529000 | -5.22728200 |
| H | -3.87307300 | -1.17161600 | -5.21348400 |
| H | -4.89763500 | -1.73380900 | -3.88046000 |
| C | -4.26778300 | 1.56534200  | -4.85136600 |
| H | -5.14413700 | 1.66350000  | -5.49910700 |
| H | -4.10881700 | 2.52238900  | -4.34485500 |
| H | -3.40237200 | 1.36905200  | -5.49052100 |
| C | -4.28877900 | 1.38341400  | 5.14517000  |
| H | -5.23866700 | 1.47416100  | 5.67775300  |
| H | -3.64138600 | 0.74113500  | 5.74738800  |
| H | -3.83896100 | 2.37836800  | 5.08245000  |
| C | -5.64670800 | 1.64095800  | 3.03481900  |
| H | -6.52759000 | 1.68946700  | 3.67909100  |
| H | -5.30360400 | 2.66539900  | 2.85811700  |
| H | -5.96608400 | 1.20641500  | 2.08441100  |
| C | -5.08111700 | -0.67270800 | 3.90041600  |
| H | -5.33445500 | -1.12110200 | 2.93617000  |
| H | -4.34599100 | -1.30601700 | 4.40284600  |
| H | -5.98745600 | -0.63983600 | 4.51168300  |
| H | 3.31766400  | 3.44703800  | -2.66207500 |
| H | 2.00098200  | -4.25082200 | 2.70301800  |
| C | 0.36167000  | 5.42283400  | 0.35587100  |
| F | 1.18105300  | 5.95763300  | 1.28837600  |

|   |             |             |             |
|---|-------------|-------------|-------------|
| F | 0.07281400  | 6.40491700  | -0.52307700 |
| F | -0.78371300 | 5.07791200  | 0.98168300  |
| C | -1.31479100 | -5.20092300 | -0.43328000 |
| F | -2.19994800 | -4.52010000 | -1.19089800 |
| F | -0.65872200 | -6.05484200 | -1.24932400 |
| F | -2.01484500 | -5.95457400 | 0.44118500  |
| F | 4.69014500  | 1.55610600  | 3.40792700  |
| F | 3.35319000  | -2.91758500 | 3.69026800  |
| H | -4.19840200 | 0.02510100  | 1.10027700  |

IrIII (in ACN)

|    |             |             |             |
|----|-------------|-------------|-------------|
| Ir | 0.00000000  | 0.00000000  | 0.80573000  |
| C  | -0.09410700 | 1.41583600  | 2.24368400  |
| C  | -1.41679700 | 1.86162800  | 2.54439600  |
| C  | 0.98288500  | 1.99945700  | 2.92282900  |
| C  | -1.58663400 | 2.87035400  | 3.50766300  |
| C  | 0.74716200  | 2.99464400  | 3.86427000  |
| C  | -0.52747600 | 3.45392400  | 4.18136000  |
| H  | 2.00731200  | 1.69883000  | 2.73673500  |
| F  | -2.82600700 | 3.31918800  | 3.81609800  |
| F  | 1.79674700  | 3.54550100  | 4.50628700  |
| H  | -0.69050700 | 4.22948700  | 4.91874400  |
| N  | -2.05756000 | 0.26570800  | 0.91139100  |
| C  | -2.94158200 | -0.42085300 | 0.16762100  |
| C  | -2.49280200 | 1.21486100  | 1.80065900  |
| C  | -4.30874500 | -0.20412400 | 0.25461100  |
| C  | -3.86983200 | 1.47159300  | 1.91684600  |
| C  | -4.77866400 | 0.76507300  | 1.14644200  |
| H  | -2.53233200 | -1.15792000 | -0.50902000 |
| H  | -5.84075500 | 0.96661100  | 1.23270300  |
| N  | 0.00000000  | 1.33804700  | -0.93927700 |
| C  | -0.02810400 | 0.74131900  | -2.15724000 |
| C  | -0.04226800 | 2.68150300  | -0.87909000 |
| C  | -0.10935800 | 1.50037400  | -3.32886200 |
| C  | -0.11665200 | 3.48090600  | -2.00887200 |
| C  | -0.15899200 | 2.89747400  | -3.28528500 |
| H  | -0.01270500 | 3.11491700  | 0.11346400  |
| H  | -0.14324400 | 0.99300600  | -4.28165000 |
| H  | -0.14608000 | 4.55606500  | -1.87695400 |
| N  | 0.00000000  | -1.33804700 | -0.93927700 |
| C  | 0.04226800  | -2.68150300 | -0.87909000 |
| C  | 0.02810400  | -0.74131900 | -2.15724000 |
| C  | 0.11665200  | -3.48090600 | -2.00887200 |
| C  | 0.10935800  | -1.50037400 | -3.32886200 |

|   |             |             |             |
|---|-------------|-------------|-------------|
| C | 0.15899200  | -2.89747400 | -3.28528500 |
| H | 0.14608000  | -4.55606500 | -1.87695400 |
| H | 0.14324400  | -0.99300600 | -4.28165000 |
| N | 2.05756000  | -0.26570800 | 0.91139100  |
| C | 2.49280200  | -1.21486100 | 1.80065900  |
| C | 2.94158200  | 0.42085300  | 0.16762100  |
| C | 3.86983200  | -1.47159300 | 1.91684600  |
| C | 4.30874500  | 0.20412400  | 0.25461100  |
| C | 4.77866400  | -0.76507300 | 1.14644200  |
| H | 5.84075500  | -0.96661100 | 1.23270300  |
| C | 0.09410700  | -1.41583600 | 2.24368400  |
| C | 1.41679700  | -1.86162800 | 2.54439600  |
| C | -0.98288500 | -1.99945700 | 2.92282900  |
| C | 1.58663400  | -2.87035400 | 3.50766300  |
| C | -0.74716200 | -2.99464400 | 3.86427000  |
| C | 0.52747600  | -3.45392400 | 4.18136000  |
| H | -2.00731200 | -1.69883000 | 2.73673500  |
| H | 0.69050700  | -4.22948700 | 4.91874400  |
| H | 2.53233200  | 1.15792000  | -0.50902000 |
| H | 0.01270500  | -3.11491700 | 0.11346400  |
| C | 0.26022700  | -3.77113400 | -4.54190700 |
| C | -0.26022700 | 3.77113400  | -4.54190700 |
| C | -0.29854600 | 2.93473000  | -5.83403300 |
| H | 0.60992100  | 2.33726900  | -5.96256500 |
| H | -1.16308000 | 2.26338000  | -5.86139300 |
| H | -0.37559500 | 3.60439800  | -6.69541600 |
| C | 0.96718300  | 4.71327800  | -4.59775900 |
| H | 0.90437100  | 5.34766200  | -5.48769200 |
| H | 1.02031000  | 5.36958100  | -3.72439500 |
| H | 1.89960500  | 4.14236700  | -4.65202300 |
| C | -1.55675600 | 4.61374600  | -4.45981300 |
| H | -1.64044600 | 5.24812500  | -5.34796800 |
| H | -2.44180600 | 3.97103800  | -4.41593000 |
| H | -1.56643300 | 5.26633200  | -3.58212900 |
| C | -0.96718300 | -4.71327800 | -4.59775900 |
| H | -0.90437100 | -5.34766200 | -5.48769200 |
| H | -1.02031000 | -5.36958100 | -3.72439500 |
| H | -1.89960500 | -4.14236700 | -4.65202300 |
| C | 0.29854600  | -2.93473000 | -5.83403300 |
| H | 0.37559500  | -3.60439800 | -6.69541600 |
| H | -0.60992100 | -2.33726900 | -5.96256500 |
| H | 1.16308000  | -2.26338000 | -5.86139300 |
| C | 1.55675600  | -4.61374600 | -4.45981300 |
| H | 2.44180600  | -3.97103800 | -4.41593000 |

|   |             |             |             |
|---|-------------|-------------|-------------|
| H | 1.56643300  | -5.26633200 | -3.58212900 |
| H | 1.64044600  | -5.24812500 | -5.34796800 |
| H | -4.21296800 | 2.22392900  | 2.60993800  |
| H | 4.21296800  | -2.22392900 | 2.60993800  |
| C | -5.26085300 | -1.03202100 | -0.56151200 |
| F | -5.78280500 | -2.04854000 | 0.16218700  |
| F | -6.29994200 | -0.29275100 | -1.00431000 |
| F | -4.65686100 | -1.58018500 | -1.63758500 |
| C | 5.26085300  | 1.03202100  | -0.56151200 |
| F | 4.65686100  | 1.58018500  | -1.63758500 |
| F | 5.78280500  | 2.04854000  | 0.16218700  |
| F | 6.29994200  | 0.29275100  | -1.00431000 |
| F | -1.79674700 | -3.54550100 | 4.50628700  |
| F | 2.82600700  | -3.31918800 | 3.81609800  |

IrII (in ACN)

|    |             |             |             |
|----|-------------|-------------|-------------|
| Ir | 0.00000000  | 0.00000000  | 0.81832800  |
| C  | 0.22527200  | 1.41058900  | 2.25444600  |
| C  | -0.96620100 | 2.14439300  | 2.54880700  |
| C  | 1.39814200  | 1.73991900  | 2.95064500  |
| C  | -0.91492100 | 3.16383600  | 3.51390000  |
| C  | 1.38304300  | 2.75993600  | 3.89298500  |
| C  | 0.24095700  | 3.49489400  | 4.20003800  |
| H  | 2.33086200  | 1.21649600  | 2.77154800  |
| F  | -2.02644600 | 3.88066500  | 3.81469000  |
| F  | 2.52407900  | 3.06234300  | 4.54945500  |
| H  | 0.24905800  | 4.28634500  | 4.93855200  |
| N  | -1.93374600 | 0.73295800  | 0.90755200  |
| C  | -2.93640100 | 0.27257300  | 0.14116300  |
| C  | -2.15384800 | 1.75585000  | 1.79457000  |
| C  | -4.21982500 | 0.79547400  | 0.20984700  |
| C  | -3.44003200 | 2.31520900  | 1.89669300  |
| C  | -4.47367300 | 1.83710900  | 1.10803300  |
| H  | -2.68265500 | -0.52944800 | -0.53881400 |
| H  | -5.46447900 | 2.27176700  | 1.18235600  |
| N  | 0.35614400  | 1.29526000  | -0.88906400 |
| C  | 0.18721300  | 0.68901300  | -2.13090200 |
| C  | 0.69125700  | 2.60170700  | -0.84663200 |
| C  | 0.40282500  | 1.46254900  | -3.31171300 |
| C  | 0.89576600  | 3.38023400  | -1.96597700 |
| C  | 0.75388800  | 2.79492300  | -3.26410200 |
| H  | 0.80185100  | 3.02173200  | 0.14803600  |
| H  | 0.28356900  | 0.97244500  | -4.26832500 |
| H  | 1.16551600  | 4.42176200  | -1.83877300 |

|   |             |             |             |
|---|-------------|-------------|-------------|
| N | -0.35614400 | -1.29526000 | -0.88906400 |
| C | -0.69125700 | -2.60170700 | -0.84663200 |
| C | -0.18721300 | -0.68901300 | -2.13090200 |
| C | -0.89576600 | -3.38023400 | -1.96597700 |
| C | -0.40282500 | -1.46254900 | -3.31171300 |
| C | -0.75388800 | -2.79492300 | -3.26410200 |
| H | -1.16551600 | -4.42176200 | -1.83877300 |
| H | -0.28356900 | -0.97244500 | -4.26832500 |
| N | 1.93374600  | -0.73295800 | 0.90755200  |
| C | 2.15384800  | -1.75585000 | 1.79457000  |
| C | 2.93640100  | -0.27257300 | 0.14116300  |
| C | 3.44003200  | -2.31520900 | 1.89669300  |
| C | 4.21982500  | -0.79547400 | 0.20984700  |
| C | 4.47367300  | -1.83710900 | 1.10803300  |
| H | 5.46447900  | -2.27176700 | 1.18235600  |
| C | -0.22527200 | -1.41058900 | 2.25444600  |
| C | 0.96620100  | -2.14439300 | 2.54880700  |
| C | -1.39814200 | -1.73991900 | 2.95064500  |
| C | 0.91492100  | -3.16383600 | 3.51390000  |
| C | -1.38304300 | -2.75993600 | 3.89298500  |
| C | -0.24095700 | -3.49489400 | 4.20003800  |
| H | -2.33086200 | -1.21649600 | 2.77154800  |
| H | -0.24905800 | -4.28634500 | 4.93855200  |
| H | 2.68265500  | 0.52944800  | -0.53881400 |
| H | -0.80185100 | -3.02173200 | 0.14803600  |
| C | -0.99365000 | -3.64997700 | -4.51582100 |
| C | 0.99365000  | 3.64997700  | -4.51582100 |
| C | 0.80196400  | 2.85343800  | -5.81963500 |
| H | 1.50108800  | 2.01354400  | -5.89029700 |
| H | -0.21597000 | 2.45998900  | -5.90983400 |
| H | 0.98166400  | 3.50682000  | -6.67942000 |
| C | 2.44130000  | 4.19808300  | -4.48904200 |
| H | 2.62414800  | 4.82519900  | -5.36869800 |
| H | 2.63022200  | 4.80694300  | -3.60002800 |
| H | 3.16920800  | 3.37980100  | -4.49807500 |
| C | 0.00000000  | 4.83724300  | -4.52043400 |
| H | 0.17207900  | 5.46976200  | -5.39830000 |
| H | -1.03493300 | 4.48069300  | -4.55634000 |
| H | 0.10990800  | 5.46363600  | -3.63031100 |
| C | -2.44130000 | -4.19808300 | -4.48904200 |
| H | -2.62414800 | -4.82519900 | -5.36869800 |
| H | -2.63022200 | -4.80694300 | -3.60002800 |
| H | -3.16920800 | -3.37980100 | -4.49807500 |
| C | -0.80196400 | -2.85343800 | -5.81963500 |



|   |             |             |             |
|---|-------------|-------------|-------------|
| H | -0.98166400 | -3.50682000 | -6.67942000 |
| H | -1.50108800 | -2.01354400 | -5.89029700 |
| H | 0.21597000  | -2.45998900 | -5.90983400 |
| C | 0.00000000  | -4.83724300 | -4.52043400 |
| H | 1.03493300  | -4.48069300 | -4.55634000 |
| H | -0.10990800 | -5.46363600 | -3.63031100 |
| H | -0.17207900 | -5.46976200 | -5.39830000 |
| H | -3.61443600 | 3.12167500  | 2.59203200  |
| H | 3.61443600  | -3.12167500 | 2.59203200  |
| C | -5.31968900 | 0.21572600  | -0.63140600 |
| F | -6.06494900 | -0.67569400 | 0.06400100  |
| F | -6.16690500 | 1.17423900  | -1.06636700 |
| F | -4.84064000 | -0.43140300 | -1.71545800 |
| C | 5.31968900  | -0.21572600 | -0.63140600 |
| F | 4.84064000  | 0.43140300  | -1.71545800 |
| F | 6.06494900  | 0.67569400  | 0.06400100  |
| F | 6.16690500  | -1.17423900 | -1.06636700 |
| F | -2.52407900 | -3.06234300 | 4.54945500  |
| F | 2.02644600  | -3.88066500 | 3.81469000  |

IrH<sub>3</sub> (in ACN)

|    |             |             |             |
|----|-------------|-------------|-------------|
| Ir | 0.83598300  | -0.31420400 | -0.03381000 |
| C  | 2.07214000  | -0.82578500 | 1.50350900  |
| C  | 1.70146300  | -2.01633800 | 2.20069100  |
| C  | 3.22777800  | -0.14579500 | 1.92306900  |
| C  | 2.50756200  | -2.46334700 | 3.26200400  |
| C  | 3.97843400  | -0.63474000 | 2.98276800  |
| C  | 3.64773100  | -1.79668500 | 3.67564900  |
| H  | 3.56262400  | 0.76229900  | 1.43383300  |
| F  | 2.19049900  | -3.59504600 | 3.94078400  |
| F  | 5.08744000  | 0.03537400  | 3.36723200  |
| H  | 4.24806500  | -2.16674000 | 4.49692700  |
| N  | -0.14988500 | -2.00537100 | 0.70647000  |
| C  | -1.33641900 | -2.44685100 | 0.25733000  |
| C  | 0.46482400  | -2.64976200 | 1.75460100  |
| C  | -1.96508000 | -3.56709800 | 0.78828400  |
| C  | -0.13145800 | -3.79379800 | 2.31243200  |
| C  | -1.34321600 | -4.25997400 | 1.82838100  |
| H  | -1.78672700 | -1.88337500 | -0.55237800 |
| H  | -1.80621400 | -5.13904100 | 2.26221500  |
| N  | -0.65279100 | 0.85212000  | 1.11712300  |
| C  | -1.60325300 | 1.46901200  | 0.37501600  |
| C  | -0.77356900 | 0.84599900  | 2.45863100  |
| C  | -2.69435400 | 2.08685500  | 0.99026100  |

|   |             |             |             |
|---|-------------|-------------|-------------|
| C | -1.83559100 | 1.44256200  | 3.11787700  |
| C | -2.84507700 | 2.08513300  | 2.38217700  |
| H | 0.01442600  | 0.34002900  | 3.00547600  |
| H | -3.43287700 | 2.56918400  | 0.36538900  |
| H | -1.86642000 | 1.39459400  | 4.20032000  |
| N | -0.60598200 | 0.28611300  | -1.54339400 |
| C | -1.32899500 | -0.59452500 | -2.30522600 |
| C | -1.31028900 | 1.50286400  | -1.12889200 |
| C | -2.63369300 | -0.49902500 | -2.67900500 |
| C | -2.50046700 | 1.86482100  | -2.04027400 |
| C | -3.47501300 | 0.68773200  | -2.26054400 |
| H | -3.04345800 | -1.26278800 | -3.33145100 |
| H | -3.00215900 | 2.75359100  | -1.64733000 |
| N | 1.99297900  | 1.26289600  | -0.69119700 |
| C | 2.89336600  | 0.97419100  | -1.68573900 |
| C | 1.91166300  | 2.51050400  | -0.19789400 |
| C | 3.70118700  | 2.00128100  | -2.20714300 |
| C | 2.69712500  | 3.55061600  | -0.67376000 |
| C | 3.60485600  | 3.28852800  | -1.70623700 |
| H | 4.22452400  | 4.08151000  | -2.11020000 |
| C | 2.02145200  | -1.28001200 | -1.33559400 |
| C | 2.91257200  | -0.43268900 | -2.06462100 |
| C | 2.01699200  | -2.65316600 | -1.62758900 |
| C | 3.73455600  | -1.00199900 | -3.05107500 |
| C | 2.85670000  | -3.15272700 | -2.61346200 |
| C | 3.72923700  | -2.35364000 | -3.34891700 |
| H | 1.36351800  | -3.34308000 | -1.10549800 |
| H | 4.37501700  | -2.76366700 | -4.11483700 |
| H | 1.19139400  | 2.66446200  | 0.59493300  |
| H | -0.74915900 | -1.45804900 | -2.63657700 |
| C | -4.65935400 | 1.01159900  | -3.23678900 |
| C | -4.03666300 | 2.73575600  | 3.09871400  |
| C | -5.01309500 | 3.41006800  | 2.11695400  |
| H | -4.53062700 | 4.21070200  | 1.54681900  |
| H | -5.44325000 | 2.69356200  | 1.40947400  |
| H | -5.84058700 | 3.85588100  | 2.67705600  |
| C | -3.51225900 | 3.80915600  | 4.08308900  |
| H | -4.35382400 | 4.27842600  | 4.60308600  |
| H | -2.84968600 | 3.38181000  | 4.84132000  |
| H | -2.96083700 | 4.59261800  | 3.55314900  |
| C | -4.80376400 | 1.64490900  | 3.88503800  |
| H | -5.65367200 | 2.09336300  | 4.41015700  |
| H | -5.18968900 | 0.87326400  | 3.21085900  |
| H | -4.16931000 | 1.15740700  | 4.63093500  |

|   |             |             |             |
|---|-------------|-------------|-------------|
| C | -5.62980100 | -0.18924600 | -3.26182900 |
| H | -6.49740600 | 0.03171900  | -3.89421500 |
| H | -5.15845600 | -1.09370700 | -3.65741900 |
| H | -5.99970500 | -0.41714900 | -2.25500900 |
| C | -5.44722100 | 2.23840300  | -2.73118100 |
| H | -6.34680300 | 2.39185400  | -3.33814000 |
| H | -5.76837100 | 2.10186500  | -1.69126300 |
| H | -4.85848100 | 3.15949300  | -2.78404200 |
| C | -4.16573800 | 1.28593700  | -4.67113200 |
| H | -3.53269100 | 2.17824900  | -4.71985400 |
| H | -3.58683200 | 0.44264500  | -5.06041000 |
| H | -5.01637900 | 1.45092300  | -5.34257200 |
| H | 0.35746300  | -4.30168400 | 3.12916200  |
| H | 4.39947700  | 1.77578600  | -2.99853400 |
| C | -3.26553800 | -4.03003800 | 0.19783700  |
| F | -3.07591100 | -4.76259800 | -0.92571900 |
| F | -3.95825400 | -4.80472800 | 1.06007100  |
| F | -4.05896800 | -2.99112400 | -0.14683900 |
| C | 2.60276000  | 4.91399500  | -0.05358700 |
| F | 1.41361500  | 5.11183200  | 0.55623200  |
| F | 3.56228300  | 5.10632200  | 0.88258800  |
| F | 2.75825800  | 5.88946800  | -0.97515400 |
| F | 2.83461900  | -4.47656700 | -2.88309700 |
| F | 4.58508300  | -0.22389400 | -3.76627100 |
| H | -0.60083300 | 2.34293600  | -1.22661500 |
| H | -2.07416500 | 2.15641200  | -3.00605800 |
| H | -3.96175200 | 0.48068300  | -1.28972100 |

IrH<sub>3</sub><sup>+</sup> (in ACN)

|    |             |             |             |
|----|-------------|-------------|-------------|
| Ir | 0.80394000  | -0.31055600 | -0.02502500 |
| C  | 2.09424500  | -0.80733800 | 1.46159600  |
| C  | 1.75430900  | -1.99479000 | 2.17544000  |
| C  | 3.25307400  | -0.11253400 | 1.83231800  |
| C  | 2.59445500  | -2.42230600 | 3.21839600  |
| C  | 4.04122800  | -0.58595100 | 2.87421000  |
| C  | 3.74054400  | -1.74093900 | 3.58904200  |
| H  | 3.56597200  | 0.79343500  | 1.32794900  |
| F  | 2.30414800  | -3.54544900 | 3.91629500  |
| F  | 5.15220200  | 0.09812600  | 3.21370900  |
| H  | 4.36787700  | -2.09608200 | 4.39658000  |
| N  | -0.12577200 | -2.03088300 | 0.72506100  |
| C  | -1.29659400 | -2.51733900 | 0.28046200  |
| C  | 0.52323100  | -2.65682800 | 1.76021200  |
| C  | -1.88383000 | -3.65564100 | 0.81199200  |

|   |             |             |             |
|---|-------------|-------------|-------------|
| C | -0.03211900 | -3.81811400 | 2.32561400  |
| C | -1.23220900 | -4.32209800 | 1.85291100  |
| H | -1.77587100 | -1.97452400 | -0.52011100 |
| H | -1.66342000 | -5.21361100 | 2.29469200  |
| N | -0.67047400 | 0.84340400  | 1.17258400  |
| C | -1.65457200 | 1.44669600  | 0.46400400  |
| C | -0.75410400 | 0.83423200  | 2.51614100  |
| C | -2.73964700 | 2.04483600  | 1.09911000  |
| C | -1.80855300 | 1.41510900  | 3.20210000  |
| C | -2.84861600 | 2.04011200  | 2.49721400  |
| H | 0.05566700  | 0.34119600  | 3.04171600  |
| H | -3.50355000 | 2.51743900  | 0.49865000  |
| H | -1.80805100 | 1.36779400  | 4.28466500  |
| N | -0.74143400 | 0.23043400  | -1.42946700 |
| C | -1.26231200 | -0.51533700 | -2.40505500 |
| C | -1.40991100 | 1.49110000  | -1.04696600 |
| C | -2.54091000 | -0.34787600 | -2.92551100 |
| C | -2.57423200 | 1.89828400  | -1.96797800 |
| C | -3.45969200 | 0.71256500  | -2.40017200 |
| H | -2.87203500 | -1.05570700 | -3.67699900 |
| H | -3.15705300 | 2.68486700  | -1.48843000 |
| N | 1.94312300  | 1.28658200  | -0.69281500 |
| C | 2.84273000  | 1.00390800  | -1.68873700 |
| C | 1.85835900  | 2.52955900  | -0.18674800 |
| C | 3.64798200  | 2.03529600  | -2.20193600 |
| C | 2.64202400  | 3.57345500  | -0.65590600 |
| C | 3.54883900  | 3.31873600  | -1.68967800 |
| H | 4.16880400  | 4.11468900  | -2.08719700 |
| C | 1.97537900  | -1.26015700 | -1.36612300 |
| C | 2.85900300  | -0.39993100 | -2.08446400 |
| C | 1.95790600  | -2.62429000 | -1.67957000 |
| C | 3.67011900  | -0.95341600 | -3.08882100 |
| C | 2.78744600  | -3.10972100 | -2.68479300 |
| C | 3.65532500  | -2.30008100 | -3.41059000 |
| H | 1.30992200  | -3.32219000 | -1.16211600 |
| H | 4.29273300  | -2.69772000 | -4.18993900 |
| H | 1.14425100  | 2.67563900  | 0.61322100  |
| H | -0.65165200 | -1.35300600 | -2.73386500 |
| C | -4.63463200 | 1.07538400  | -3.37342800 |
| C | -4.02990800 | 2.67121200  | 3.24565700  |
| C | -5.04354100 | 3.32800500  | 2.29060500  |
| H | -4.59036000 | 4.13685100  | 1.70829700  |
| H | -5.48229300 | 2.60398600  | 1.59621600  |
| H | -5.86194500 | 3.76009300  | 2.87374000  |

|   |             |             |             |
|---|-------------|-------------|-------------|
| C | -3.49409800 | 3.75351500  | 4.21446200  |
| H | -4.32938800 | 4.20728100  | 4.75723000  |
| H | -2.80369900 | 3.33812000  | 4.95415000  |
| H | -2.97230500 | 4.54627200  | 3.66890700  |
| C | -4.75421100 | 1.56603500  | 4.05293100  |
| H | -5.59615400 | 2.00114400  | 4.60098300  |
| H | -5.14591100 | 0.78748900  | 3.39026400  |
| H | -4.09079100 | 1.09075900  | 4.78118000  |
| C | -5.52486800 | -0.17013300 | -3.56994300 |
| H | -6.37600000 | 0.07485500  | -4.21359900 |
| H | -4.99094700 | -0.99941300 | -4.04410700 |
| H | -5.92067500 | -0.52799000 | -2.61279100 |
| C | -5.50277300 | 2.18617300  | -2.74729200 |
| H | -6.39459500 | 2.35316500  | -3.36002300 |
| H | -5.83768600 | 1.91019500  | -1.74052300 |
| H | -4.97177700 | 3.14047300  | -2.68077000 |
| C | -4.10872600 | 1.54909700  | -4.74347400 |
| H | -3.51024900 | 2.46172800  | -4.65955700 |
| H | -3.49280100 | 0.78457500  | -5.22927300 |
| H | -4.94821400 | 1.76987800  | -5.41094300 |
| H | 0.48112400  | -4.31008900 | 3.13692900  |
| H | 4.34741900  | 1.81807200  | -2.99436600 |
| C | -3.17148000 | -4.17618800 | 0.23865900  |
| F | -2.95417800 | -5.14675200 | -0.67800100 |
| F | -3.95625500 | -4.71091600 | 1.19751000  |
| F | -3.87711700 | -3.20209000 | -0.37662800 |
| C | 2.54823500  | 4.93374400  | -0.02376100 |
| F | 1.36623700  | 5.11671800  | 0.60230700  |
| F | 3.51968700  | 5.12089400  | 0.89831200  |
| F | 2.68466500  | 5.91310400  | -0.94220600 |
| F | 2.75501700  | -4.42510600 | -2.97630700 |
| F | 4.51456400  | -0.16653300 | -3.79541400 |
| H | -0.63685300 | 2.26256900  | -1.17555300 |
| H | -2.13097900 | 2.34949700  | -2.86054500 |
| H | -3.93814000 | 0.30011000  | -1.49423700 |
